# Supplementary material for: The pancreatic β-cell incretin response is modulated by mitochondrial transaminase GPT2
Source: Research Square preprint supplement (doi:10.21203/rs.3.rs-6950998/v1), 2025-06-30
Supplement: Supplementary file 1 [file 940ebdeb4ddfb1030046afdb.docx]

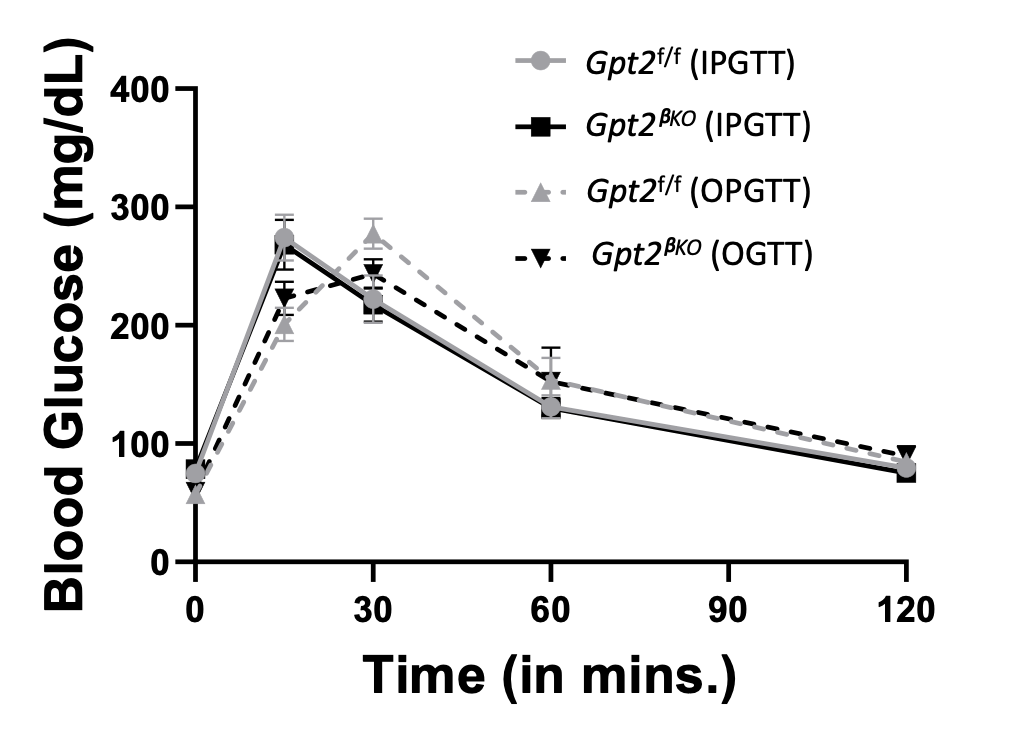


**Supplementary Fig.1**. IP and oral glucose tolerance of 10–12-week-old normal chow-fed, female *Gpt2*f/f and *Gpt2*βKO mice. Mean ± SE, N=5-7/group.

**Supplementary Fig. 2**. **a**. GLP-1 and **b.** GIP concentrations were measured by ELISA in mouse serum after an overnight fast, followed by an oral glucose injection of 3g/kg per Kg body weight. Data is means ± SEM.2-way ANOVA followed by Tukey’s multiple test: *, P < 0.05, **, P < 0.005 Relative to corresponding Control Diet. #, P < 0.05, ##, P < 0.005 , relative to 0 time point in respective diet group. $, P < 0.05, relative to diet matched *Gpt2*f/f littermates. N=6-8 in each group. **c.** Insulin tolerance test performed on male 33-week-old *Gpt2*f/f and Gpt2βKO mice after 29 weeks of 45 kcal% HFD or matched CD by injecting 0.75U/Kg body weight. Mean ± SE, **P< 0.01 compared to corresponding Control Diet (CD)—significance calculated using two-way ANOVA and Tukey’s Post-test. N= 8 (*Gpt2*f/f), 7(*Gpt2*βKO).

**Supplementary Fig. 3**. **a**. Upset plot showing overlap of DEGs between four datasets: GLT (*Gpt2*βKO vs. *Gpt2*f/f), *Gpt2*f/f (Cont vs. GLT), T2D_1, T2D_2, and db/db. ( Significance calculated using hypergeometric test, *P< 0.01, **P<0.001). **b.** Clustering heatmap showing relative expression of cell cycle and chromosomal maintenance genes from GLT (*Gpt2*βKO vs. *Gpt2*f/f) dataset. Each column represents a biological replicate, and colors indicate the degree of enrichment, with red being upregulated and blue being downregulated. **c.** Volcano plot showing differentially expressed genes (DEGs, defined as genes having adjusted P-value ≤ 0.05 and absolute Log2 fold change ≥ 0.27) from Cont (*Gpt2*βKO vs. *Gpt2*f/f) data group, that are upregulated(red), downregulated(blue) genes, or no significant change (grey). **d.** Top five Reactome pathways identified through DAVID GO analysis using upregulated or downregulated DEGs between *Gpt2*βKO vs. *Gpt2*f/f dataset.

**Supplementary Fig.4**. **a.** Representative WB showing GPT2 protein levels (left) of islets from 2 non-diabetic (ND) donors and 2 type-2 diabetic donors (T2D). **b**. Western blot analysis of HEK293 cells transiently transfected with non-targeting shNA (NT), or 3 different shRNA constructs targeting human GPT2 mRNA. **c**.Control non-diabetic human islets under baseline culture conditions were lentivirally transduced with human beta cells expressed *GPT2* shRNA or non-targeting shRNA and stained for Hoechst(blue), insulin (red), and GFP (green) on the left, or Hoechst(blue), glucagon (red), and GFP (green) on the right. **d**. Quantification of % of Ins+GFP+ over Ins+ cells. Atleast 500 Ins+ or Gcg+ cells were quantified from two independent donors (right). Scale bar is 30μm. **e**. GSIS in batch incubations of un-transduced, non-diabetic donor islets exposed to indicated secretagogues, normalized as percentage of total insulin content, and presented as fractional insulin secretion. Mean± SE, n=3 (technical replicates of islets from a single donor). Significance was calculated using 2-way ANOVA with multiple comparisons ( *P< 0.05).
