# Supplementary material for: The pancreatic β-cell incretin response is modulated by mitochondrial transaminase GPT2
Source: Research Square preprint supplement (doi:10.21203/rs.3.rs-6950998/v1), 2025-06-30
Supplement: Supplementary file 2 [file c1484641dcf287a3cea1300b.xlsx]

## Sheet: Supplementary Table 1
			List of Differentially Expressed Genes ( Gpt2βKO vs. Gpt2f/f ) under Control conditions
gene_symbol	baseMean	log2FoldChange	lfcSE	stat	pvalue	padj	Entrez_id	Species	Gene.Name
Clps	40.0012	4.43456	1.43651	3.08703	0.00202164	0.0187069	109791	Mus musculus	colipase, pancreatic(Clps)
Pnlip	44.4325	4.33601	1.43222	3.02747	0.00246608	0.0215116	69060	Mus musculus	pancreatic lipase(Pnlip)
Cpa1	138.256	4.13218	1.4603	2.82969	0.00465937	0.0343309	109697	Mus musculus	carboxypeptidase A1, pancreatic(Cpa1)
Pnliprp1	297.602	3.9854	1.36108	2.92812	0.00341013	0.0271825	18946	Mus musculus	pancreatic lipase related protein 1(Pnliprp1)
Klk1	44.0317	3.81095	1.1501	3.3136	0.000921033	0.010312	16612	Mus musculus	kallikrein 1(Klk1)
Cel	175.487	3.52181	1.26699	2.77966	0.00544157	0.0386331	12613	Mus musculus	carboxyl ester lipase(Cel)
Serpina3c	19.9302	3.07554	0.393531	7.81524	5.48567e-15	3.20605e-12	16625	Mus musculus	serine (or cysteine) peptidase inhibitor, clade A, member 3C(Serpina3c)
Pnliprp2	26.6653	3.05001	1.02323	2.98077	0.00287525	0.0240915	18947	Mus musculus	pancreatic lipase-related protein 2(Pnliprp2)
Slc35f2	25.6076	3.0098	0.406957	7.39587	1.40483e-13	6.41435e-11	72022	Mus musculus	solute carrier family 35, member F2(Slc35f2)
Mc5r	49.1226	2.39222	0.590403	4.05185	5.08146e-05	0.00112663	17203	Mus musculus	melanocortin 5 receptor(Mc5r)
Ctrl	77.7534	2.25916	0.6506	3.47242	0.000515796	0.00666532	109660	Mus musculus	chymotrypsin-like(Ctrl)
Rab39	245.953	2.20388	0.238431	9.2433	2.39021e-20	3.17485e-17	270160	Mus musculus	RAB39, member RAS oncogene family(Rab39)
Zdhhc22	55.2336	2.11851	0.306658	6.9084	4.9014e-12	1.49196e-09	238331	Mus musculus	zinc finger, DHHC-type containing 22(Zdhhc22)
Npas4	132.165	2.08718	0.222936	9.36227	7.80409e-21	1.26047e-17	225872	Mus musculus	neuronal PAS domain protein 4(Npas4)
Rnase1	42.1282	1.95957	0.641836	3.05308	0.00226508	0.0203287	19752	Mus musculus	ribonuclease, RNase A family, 1 (pancreatic)(Rnase1)
Sod3	66.1496	1.83276	0.215122	8.51963	1.6006e-17	1.46164e-14	20657	Mus musculus	superoxide dismutase 3, extracellular(Sod3)
Abca4	103.47	1.70394	0.245961	6.92769	4.27767e-12	1.32981e-09	11304	Mus musculus	ATP-binding cassette, sub-family A member 4(Abca4)
Itgad	206.617	1.67909	0.177719	9.448	3.4537e-21	8.34836e-18	381924	Mus musculus	integrin, alpha D(Itgad)
F13a1	39.8319	1.63566	0.373092	4.38406	1.16485e-05	0.000353104	74145	Mus musculus	coagulation factor XIII, A1 subunit(F13a1)
Gm5860	32.0457	1.63094	0.355924	4.58227	4.59961e-06	0.000167176	545641	Mus musculus	predicted gene 5860(Gm5860)
Nr4a1	702.002	1.55292	0.164633	9.43262	3.99963e-21	8.34836e-18	15370	Mus musculus	nuclear receptor subfamily 4, group A, member 1(Nr4a1)
Serpina3n	88.1121	1.49449	0.409624	3.64844	0.000263839	0.00398238	20716	Mus musculus	serine (or cysteine) peptidase inhibitor, clade A, member 3N(Serpina3n)
Spsb4	42.5137	1.46007	0.328969	4.43833	9.06609e-06	0.000289857	211949	Mus musculus	splA/ryanodine receptor domain and SOCS box containing 4(Spsb4)
Cox6a2	967.842	1.44829	0.154062	9.40065	5.42275e-21	9.90397e-18	12862	Mus musculus	cytochrome c oxidase subunit 6A2(Cox6a2)
Mir212	19.4959	1.44565	0.357097	4.04835	5.15794e-05	0.00113812	387208	Mus musculus	microRNA 212(Mir212)
Tcim	222.485	1.43254	0.218632	6.55231	5.66544e-11	1.37963e-08	69068	Mus musculus	transcriptional and immune response regulator(Tcim)
Derl3	710.045	1.40835	0.517087	2.72362	0.00645712	0.0438814	70377	Mus musculus	Der1-like domain family, member 3(Derl3)
Il1rn	73.1084	1.39123	0.471807	2.94872	0.00319089	0.0259733	16181	Mus musculus	interleukin 1 receptor antagonist(Il1rn)
Steap4	50.0775	1.36726	0.467066	2.92735	0.00341867	0.027206	117167	Mus musculus	STEAP family member 4(Steap4)
Tnfrsf23	655.381	1.34014	0.384761	3.48304	0.000495758	0.00648421	79201	Mus musculus	tumor necrosis factor receptor superfamily, member 23(Tnfrsf23)
Dapl1	728.662	1.31804	0.395779	3.33025	0.000867671	0.00988888	76747	Mus musculus	death associated protein-like 1(Dapl1)
Sgcd	269.826	1.31717	0.44121	2.98536	0.00283244	0.0238878	24052	Mus musculus	sarcoglycan, delta (dystrophin-associated glycoprotein)(Sgcd)
Gucy2c	1143.62	1.19309	0.250245	4.76768	1.86356e-06	8.40384e-05	14917	Mus musculus	guanylate cyclase 2c(Gucy2c)
Cela1	317.991	1.18508	0.439224	2.69813	0.00697307	0.0463771	109901	Mus musculus	chymotrypsin-like elastase family, member 1(Cela1)
Mir670	58.6129	1.17728	0.206599	5.6984	1.20939e-08	1.46036e-06	735259	Mus musculus	microRNA 670(Mir670)
Tent5a	6092.98	1.1595	0.380656	3.04605	0.00231871	0.0206577	212943	Mus musculus	terminal nucleotidyltransferase 5A(Tent5a)
Aass	124.509	1.15714	0.256758	4.50672	6.58373e-06	0.00022423	30956	Mus musculus	aminoadipate-semialdehyde synthase(Aass)
Nckap5	322.403	1.0796	0.170735	6.32326	2.561e-10	5.12586e-08	210356	Mus musculus	NCK-associated protein 5(Nckap5)
Zp2	45.0512	1.07378	0.262758	4.08657	4.37795e-05	0.00100104	22787	Mus musculus	zona pellucida glycoprotein 2(Zp2)
Meltf	276.624	1.07168	0.0980842	10.9261	8.64842e-28	6.3181e-24	30060	Mus musculus	melanotransferrin(Meltf)
Lyzl4	46.4979	1.01367	0.279664	3.62458	0.000289435	0.0042977	69032	Mus musculus	lysozyme-like 4(Lyzl4)
Sfrp1	56.6415	1.00335	0.284846	3.52242	0.000427628	0.00580892	20377	Mus musculus	secreted frizzled-related protein 1(Sfrp1)
Col16a1	154.154	0.995652	0.314434	3.16649	0.00154291	0.0152115	107581	Mus musculus	collagen, type XVI, alpha 1(Col16a1)
Sdf2l1	1746.16	0.985778	0.264528	3.72655	0.000194118	0.0031444	64136	Mus musculus	stromal cell-derived factor 2-like 1(Sdf2l1)
Creld2	1357.06	0.984698	0.254427	3.87026	0.000108719	0.00203132	76737	Mus musculus	cysteine-rich with EGF-like domains 2(Creld2)
Cdc6	120.744	0.984332	0.130008	7.57133	3.69433e-14	1.99918e-11	23834	Mus musculus	cell division cycle 6(Cdc6)
Rasl10b	205.06	0.976342	0.174914	5.58184	2.37988e-08	2.46613e-06	276952	Mus musculus	RAS-like, family 10, member B(Rasl10b)
Gpx2	759.095	0.97416	0.198047	4.91882	8.70668e-07	4.55461e-05	14776	Mus musculus	glutathione peroxidase 2(Gpx2)
Gm5105	32.6864	0.972228	0.279177	3.48248	0.000496788	0.00648421	329763	Mus musculus	predicted gene 5105(Gm5105)
Ell3	58.4193	0.965734	0.163541	5.90517	3.52284e-09	5.25226e-07	269344	Mus musculus	elongation factor RNA polymerase II-like 3(Ell3)
Fkbp11	420.87	0.963077	0.356941	2.69814	0.00697272	0.0463771	66120	Mus musculus	FK506 binding protein 11(Fkbp11)
Ptger4	62.4403	0.957874	0.277824	3.44777	0.000565234	0.00717927	19219	Mus musculus	prostaglandin E receptor 4 (subtype EP4)(Ptger4)
Atp6v1c2	21.9808	0.95739	0.323828	2.95647	0.00311178	0.0254701	68775	Mus musculus	ATPase, H+ transporting, lysosomal V1 subunit C2(Atp6v1c2)
Ccdc141	77.1893	0.95427	0.162865	5.85927	4.64893e-09	6.40807e-07	545428	Mus musculus	coiled-coil domain containing 141(Ccdc141)
Cthrc1	65.1593	0.948172	0.351124	2.70039	0.00692587	0.0461988	68588	Mus musculus	collagen triple helix repeat containing 1(Cthrc1)
Vegfc	77.5102	0.946547	0.161113	5.87505	4.22715e-09	5.99653e-07	22341	Mus musculus	vascular endothelial growth factor C(Vegfc)
Ckmt2	20.4561	0.946377	0.334997	2.82503	0.00472758	0.0346792	76722	Mus musculus	creatine kinase, mitochondrial 2(Ckmt2)
Arhgef37	233.894	0.937003	0.142964	6.55411	5.59747e-11	1.37963e-08	328967	Mus musculus	Rho guanine nucleotide exchange factor 37(Arhgef37)
Nr4a2	695.204	0.934325	0.177392	5.26699	1.38676e-07	1.06642e-05	18227	Mus musculus	nuclear receptor subfamily 4, group A, member 2(Nr4a2)
Akap6	927.689	0.927076	0.164784	5.626	1.8444e-08	2.05509e-06	238161	Mus musculus	A kinase anchor protein 6(Akap6)
4930447N08Rik	58.5511	0.918778	0.184557	4.97828	6.41533e-07	3.51065e-05	71647	Mus musculus	RIKEN cDNA 4930447N08 gene(4930447N08Rik)
Srgn	59.595	0.915727	0.283789	3.22679	0.00125187	0.0129908	19073	Mus musculus	serglycin(Srgn)
Rfc4	79.6982	0.91424	0.169079	5.40717	6.4028e-08	5.66978e-06	106344	Mus musculus	replication factor C (activator 1) 4(Rfc4)
4930455J16Rik	27.8602	0.888539	0.253404	3.50641	0.000454198	0.00606053	67585	Mus musculus	RIKEN cDNA 4930455J16 gene(4930455J16Rik)
Cemip	87.0574	0.87461	0.190968	4.57987	4.65271e-06	0.000168269	80982	Mus musculus	cell migration inducing protein, hyaluronan binding(Cemip)
Kcnh1	765.734	0.869535	0.205536	4.23058	2.33087e-05	0.000618082	16510	Mus musculus	potassium voltage-gated channel, subfamily H (eag-related), member 1(Kcnh1)
Fosl2	869.116	0.855302	0.19083	4.482	7.39457e-06	0.000246109	14284	Mus musculus	fos-like antigen 2(Fosl2)
Asb5	29.2516	0.854631	0.227831	3.75116	0.000176021	0.00292254	76294	Mus musculus	ankyrin repeat and SOCs box-containing 5(Asb5)
Spry4	289.981	0.83474	0.183187	4.55676	5.19476e-06	0.000184673	24066	Mus musculus	sprouty RTK signaling antagonist 4(Spry4)
Kcna2	607.131	0.831167	0.122418	6.78957	1.1247e-11	3.1602e-09	16490	Mus musculus	potassium voltage-gated channel, shaker-related subfamily, member 2(Kcna2)
Shc4	188.394	0.826398	0.245225	3.36996	0.000751797	0.00885847	271849	Mus musculus	SHC (Src homology 2 domain containing) family, member 4(Shc4)
Trim67	178.86	0.820802	0.162047	5.0652	4.07962e-07	2.496e-05	330863	Mus musculus	tripartite motif-containing 67(Trim67)
Gm30539	30.7363	0.818017	0.270069	3.02892	0.00245428	0.0214215	102632477	Mus musculus	predicted gene, 30539(Gm30539)
Slc17a9	912.148	0.791647	0.175743	4.50459	6.65025e-06	0.000225969	228993	Mus musculus	solute carrier family 17, member 9(Slc17a9)
Mcm5	283.587	0.781318	0.105036	7.43859	1.01764e-13	4.79637e-11	17218	Mus musculus	minichromosome maintenance complex component 5(Mcm5)
Ift57	2141.92	0.763631	0.0816572	9.35168	8.62683e-21	1.26047e-17	73916	Mus musculus	intraflagellar transport 57(Ift57)
Mir129-1	36.4341	0.758421	0.232381	3.2637	0.00109968	0.0117624	387237	Mus musculus	microRNA 129-1(Mir129-1)
Ctnnal1	2113.65	0.748736	0.107438	6.96901	3.19169e-12	1.03631e-09	54366	Mus musculus	catenin alpha like 1(Ctnnal1)
Gm38413	84.4081	0.745668	0.251312	2.96709	0.00300628	0.0247863	330133	Mus musculus	predicted gene, 38413(Gm38413)
Hapln4	3466.82	0.745133	0.136972	5.44004	5.32677e-08	4.80429e-06	330790	Mus musculus	hyaluronan and proteoglycan link protein 4(Hapln4)
Fgb	72.8927	0.739312	0.205289	3.60132	0.0003166	0.00460897	110135	Mus musculus	fibrinogen beta chain(Fgb)
Dapp1	437.426	0.739308	0.0846619	8.73247	2.49169e-18	2.60043e-15	26377	Mus musculus	dual adaptor for phosphotyrosine and 3-phosphoinositides 1(Dapp1)
Cpa2	341.126	0.739222	0.163877	4.51083	6.45743e-06	0.000221999	232680	Mus musculus	carboxypeptidase A2, pancreatic(Cpa2)
Prss12	47.1689	0.73921	0.231199	3.19729	0.00138727	0.0140565	19142	Mus musculus	serine protease 12 neurotrypsin (motopsin)(Prss12)
S100b	24.3505	0.73878	0.25774	2.86638	0.004152	0.0315142	20203	Mus musculus	S100 protein, beta polypeptide, neural(S100b)
Tcf24	901.435	0.735114	0.172564	4.25994	2.04478e-05	0.000555194	100039596	Mus musculus	transcription factor 24(Tcf24)
Loxl3	46.3482	0.732663	0.254762	2.87587	0.00402917	0.0308383	16950	Mus musculus	lysyl oxidase-like 3(Loxl3)
Arid5a	179.283	0.731725	0.179878	4.06789	4.74415e-05	0.00106641	214855	Mus musculus	AT-rich interaction domain 5A(Arid5a)
Npas2	186.71	0.715085	0.17776	4.02275	5.75215e-05	0.00124333	18143	Mus musculus	neuronal PAS domain protein 2(Npas2)
Bag2	395.805	0.713179	0.113719	6.27142	3.57759e-10	6.87792e-08	213539	Mus musculus	BCL2-associated athanogene 2(Bag2)
Tgm2	163.657	0.710308	0.229986	3.08848	0.00201183	0.0186398	21817	Mus musculus	transglutaminase 2, C polypeptide(Tgm2)
Nsl1	42.6224	0.706896	0.189331	3.73365	0.000188723	0.00308437	381318	Mus musculus	NSL1, MIS12 kinetochore complex component(Nsl1)
Eef1akmt3	154.453	0.705147	0.152873	4.61263	3.97603e-06	0.000151052	100504608	Mus musculus	EEF1A lysine methyltransferase 3(Eef1akmt3)
Crym	152.9	0.702419	0.125309	5.6055	2.07651e-08	2.2293e-06	12971	Mus musculus	crystallin, mu(Crym)
Hdac9	261.035	0.694966	0.118033	5.88789	3.91157e-09	5.71519e-07	79221	Mus musculus	histone deacetylase 9(Hdac9)
Mapkapk3	170.695	0.693165	0.12332	5.62086	1.90009e-08	2.0718e-06	102626	Mus musculus	mitogen-activated protein kinase-activated protein kinase 3(Mapkapk3)
Pdia4	6455.84	0.69269	0.136946	5.05813	4.23394e-07	2.54495e-05	12304	Mus musculus	protein disulfide isomerase associated 4(Pdia4)
Cdt1	112.558	0.690486	0.153848	4.48809	7.18639e-06	0.000240827	67177	Mus musculus	chromatin licensing and DNA replication factor 1(Cdt1)
Fhl1	1009.64	0.689157	0.0888638	7.7552	8.82039e-15	4.95672e-12	14199	Mus musculus	four and a half LIM domains 1(Fhl1)
Tlr4	66.1365	0.688072	0.244925	2.80932	0.00496469	0.0359104	21898	Mus musculus	toll-like receptor 4(Tlr4)
Cenpw	36.9124	0.680958	0.251243	2.71035	0.00672117	0.0450886	66311	Mus musculus	centromere protein W(Cenpw)
Clptm1l	4913	0.675107	0.144698	4.66562	3.07695e-06	0.000123509	218335	Mus musculus	CLPTM1-like(Clptm1l)
Hyou1	26396.3	0.673316	0.0839722	8.01831	1.07206e-15	6.5266e-13	12282	Mus musculus	hypoxia up-regulated 1(Hyou1)
Cenpm	47.6732	0.670628	0.216188	3.10206	0.00192178	0.0180187	66570	Mus musculus	centromere protein M(Cenpm)
Dusp4	470.932	0.669938	0.171074	3.91606	9.00074e-05	0.0017488	319520	Mus musculus	dual specificity phosphatase 4(Dusp4)
B3gnt9	247.387	0.66658	0.14325	4.65326	3.26729e-06	0.000129662	97440	Mus musculus	UDP-GlcNAc:betaGal beta-1,3-N-acetylglucosaminyltransferase 9(B3gnt9)
Sphk1	46.9831	0.666253	0.21379	3.11639	0.00183079	0.0173699	20698	Mus musculus	sphingosine kinase 1(Sphk1)
Chaf1b	101.193	0.665501	0.133086	5.00053	5.71741e-07	3.20066e-05	110749	Mus musculus	chromatin assembly factor 1, subunit B(Chaf1b)
Manf	5464.32	0.663661	0.16079	4.1275	3.66721e-05	0.000878387	74840	Mus musculus	mesencephalic astrocyte-derived neurotrophic factor(Manf)
Ppa1	611.024	0.662476	0.101354	6.53627	6.30718e-11	1.51073e-08	67895	Mus musculus	pyrophosphatase (inorganic) 1(Ppa1)
Emilin1	1733.05	0.660821	0.119445	5.53244	3.15802e-08	3.11659e-06	100952	Mus musculus	elastin microfibril interfacer 1(Emilin1)
AW011738	84.8987	0.659869	0.191782	3.44073	0.00058014	0.00730921	100382	Mus musculus	expressed sequence AW011738(AW011738)
D430020J02Rik	126.35	0.658429	0.135541	4.85777	1.18716e-06	5.89986e-05	319545	Mus musculus	RIKEN cDNA D430020J02 gene(D430020J02Rik)
Dnajb11	1947.88	0.649404	0.104464	6.21657	5.08152e-10	9.39824e-08	67838	Mus musculus	DnaJ heat shock protein family (Hsp40) member B11(Dnajb11)
Nrros	92.2004	0.649373	0.166051	3.91069	9.20323e-05	0.00177868	224109	Mus musculus	negative regulator of reactive oxygen species(Nrros)
Stk32b	151.317	0.646995	0.219496	2.94765	0.00320203	0.026035	64293	Mus musculus	serine/threonine kinase 32B(Stk32b)
Cks1b	173.087	0.645157	0.216957	2.97366	0.00294268	0.0244153	54124	Mus musculus	CDC28 protein kinase 1b(Cks1b)
Pde5a	3329.18	0.64273	0.0752467	8.54164	1.32334e-17	1.28903e-14	242202	Mus musculus	phosphodiesterase 5A, cGMP-specific(Pde5a)
Mcm3	316.98	0.642593	0.114505	5.61192	2.00096e-08	2.16563e-06	17215	Mus musculus	minichromosome maintenance complex component 3(Mcm3)
Hsd17b12	1310.53	0.641828	0.0875169	7.33376	2.23785e-13	9.34208e-11	56348	Mus musculus	hydroxysteroid (17-beta) dehydrogenase 12(Hsd17b12)
Hsp90b1	28811.2	0.640511	0.219539	2.91752	0.00352825	0.0279562	22027	Mus musculus	heat shock protein 90, beta (Grp94), member 1(Hsp90b1)
Endog	81.0196	0.639843	0.13469	4.7505	2.02918e-06	8.87673e-05	13804	Mus musculus	endonuclease G(Endog)
Slco5a1	98.9995	0.638827	0.146754	4.35305	1.34256e-05	0.000393109	240726	Mus musculus	solute carrier organic anion transporter family, member 5A1(Slco5a1)
Cldn23	107.753	0.637139	0.133278	4.78053	1.74835e-06	8.01413e-05	71908	Mus musculus	claudin 23(Cldn23)
Nxph3	66.6127	0.636443	0.172226	3.69539	0.000219546	0.0034757	104079	Mus musculus	neurexophilin 3(Nxph3)
Abca14	62.5522	0.632873	0.212044	2.98463	0.00283917	0.0238918	67928	Mus musculus	ATP-binding cassette, sub-family A member 14(Abca14)
Sntg2	79.8969	0.6327	0.222742	2.8405	0.00450423	0.0334237	268534	Mus musculus	syntrophin, gamma 2(Sntg2)
Kcnn3	1534.3	0.630279	0.0746443	8.44377	3.07276e-17	2.49423e-14	140493	Mus musculus	potassium intermediate/small conductance calcium-activated channel, subfamily N, member 3(Kcnn3)
Dtl	169.507	0.615841	0.1851	3.32706	0.000877662	0.00994843	76843	Mus musculus	denticleless E3 ubiquitin protein ligase(Dtl)
Hbegf	164.685	0.613311	0.144114	4.25575	2.0835e-05	0.000561661	15200	Mus musculus	heparin-binding EGF-like growth factor(Hbegf)
Hspa13	6905.66	0.610638	0.0894452	6.82695	8.6739e-12	2.48499e-09	110920	Mus musculus	heat shock protein 70 family, member 13(Hspa13)
D830050J10Rik	50.0575	0.609251	0.210752	2.89085	0.00384207	0.0298123	352968	Mus musculus	RIKEN cDNA D830050J10 gene(D830050J10Rik)
Yif1b	587.451	0.605587	0.0914975	6.61862	3.62573e-11	9.13372e-09	77254	Mus musculus	Yip1 interacting factor homolog B (S. cerevisiae)(Yif1b)
Vcan	321.137	0.602727	0.217999	2.76482	0.00569541	0.040046	13003	Mus musculus	versican(Vcan)
Kcnf1	412.683	0.599671	0.196741	3.04801	0.0023036	0.0205733	382571	Mus musculus	potassium voltage-gated channel, subfamily F, member 1(Kcnf1)
Hspb6	385.456	0.599327	0.0974031	6.15305	7.60061e-10	1.32205e-07	243912	Mus musculus	heat shock protein, alpha-crystallin-related, B6(Hspb6)
Brip1	141.138	0.598643	0.186936	3.20239	0.00136291	0.0138673	237911	Mus musculus	BRCA1 interacting protein C-terminal helicase 1(Brip1)
Pdia6	8711.64	0.595444	0.133854	4.44847	8.6484e-06	0.000278944	71853	Mus musculus	protein disulfide isomerase associated 6(Pdia6)
Kcnk13	54.4877	0.59432	0.179791	3.30563	0.000947646	0.0104552	217826	Mus musculus	potassium channel, subfamily K, member 13(Kcnk13)
Pole	300.64	0.592324	0.137007	4.32331	1.53704e-05	0.000436071	18973	Mus musculus	polymerase (DNA directed), epsilon(Pole)
P4hb	24853.2	0.590427	0.192875	3.06119	0.00220457	0.0198956	18453	Mus musculus	prolyl 4-hydroxylase, beta polypeptide(P4hb)
Psat1	1264.49	0.587882	0.168525	3.4884	0.00048592	0.00638469	107272	Mus musculus	phosphoserine aminotransferase 1(Psat1)
Cldn3	229.642	0.585863	0.163286	3.58795	0.000333282	0.00477475	12739	Mus musculus	claudin 3(Cldn3)
Spc25	2556.4	0.582446	0.123209	4.72729	2.27538e-06	9.77791e-05	66442	Mus musculus	SPC25, NDC80 kinetochore complex component, homolog (S. cerevisiae)(Spc25)
Limch1	1151.55	0.578885	0.101939	5.67872	1.35704e-08	1.60577e-06	77569	Mus musculus	LIM and calponin homology domains 1(Limch1)
Mfsd6l	185.872	0.578469	0.11065	5.22792	1.7143e-07	1.26503e-05	215723	Mus musculus	major facilitator superfamily domain containing 6-like(Mfsd6l)
Cdk18	404.893	0.577133	0.169489	3.40514	0.000661311	0.00807219	18557	Mus musculus	cyclin dependent kinase 18(Cdk18)
Prrt3	137.891	0.577048	0.125345	4.60367	4.15103e-06	0.000155117	210673	Mus musculus	proline-rich transmembrane protein 3(Prrt3)
Cntnap5b	106.87	0.576643	0.20385	2.82876	0.00467292	0.0343613	241175	Mus musculus	contactin associated protein-like 5B(Cntnap5b)
Acsf2	262.133	0.57433	0.166747	3.44432	0.0005725	0.00724853	264895	Mus musculus	acyl-CoA synthetase family member 2(Acsf2)
Tmc7	469.974	0.573227	0.080712	7.10213	1.22852e-12	4.17439e-10	209760	Mus musculus	transmembrane channel-like gene family 7(Tmc7)
Chek1	224.132	0.572609	0.163648	3.49902	0.00046697	0.00617875	12649	Mus musculus	checkpoint kinase 1(Chek1)
Pycr1	1264.07	0.572105	0.186083	3.07447	0.00210881	0.0192243	209027	Mus musculus	pyrroline-5-carboxylate reductase 1(Pycr1)
Spcs1	2275.8	0.569778	0.17115	3.32911	0.000871239	0.00990636	69019	Mus musculus	signal peptidase complex subunit 1 homolog (S. cerevisiae)(Spcs1)
Trim9	1255.76	0.566851	0.114323	4.95832	7.11058e-07	3.80559e-05	94090	Mus musculus	tripartite motif-containing 9(Trim9)
Tmem71	341.678	0.566072	0.14928	3.79201	0.000149431	0.00259612	213068	Mus musculus	transmembrane protein 71(Tmem71)
Mcm2	546.53	0.564144	0.105951	5.32456	1.01197e-07	8.30667e-06	17216	Mus musculus	minichromosome maintenance complex component 2(Mcm2)
Etv5	978.721	0.563531	0.112673	5.00148	5.68912e-07	3.19707e-05	104156	Mus musculus	ets variant 5(Etv5)
Fen1	365.202	0.563386	0.128013	4.401	1.07755e-05	0.000332503	14156	Mus musculus	flap structure specific endonuclease 1(Fen1)
Il20rb	105.856	0.558813	0.145716	3.83493	0.000125599	0.00224618	213208	Mus musculus	interleukin 20 receptor beta(Il20rb)
Rassf10	340.689	0.557451	0.111607	4.99477	5.89071e-07	3.2701e-05	78748	Mus musculus	Ras association (RalGDS/AF-6) domain family (N-terminal) member 10(Rassf10)
Rbm20	282.95	0.555827	0.162594	3.41849	0.000629685	0.00778369	73713	Mus musculus	RNA binding motif protein 20(Rbm20)
Csrp1	556.199	0.555526	0.145864	3.80853	0.000139797	0.00245797	13007	Mus musculus	cysteine and glycine-rich protein 1(Csrp1)
Sema3c	244.425	0.551232	0.193845	2.84368	0.00445962	0.0332277	20348	Mus musculus	sema domain, immunoglobulin domain (Ig), short basic domain, secreted, (semaphorin) 3C(Sema3c)
Srrm4	401.679	0.54927	0.12535	4.38189	1.17654e-05	0.000355329	68955	Mus musculus	serine/arginine repetitive matrix 4(Srrm4)
Pold2	415.119	0.549231	0.109657	5.00862	5.48222e-07	3.11676e-05	18972	Mus musculus	polymerase (DNA directed), delta 2, regulatory subunit(Pold2)
D030047H15Rik	40.1934	0.548862	0.196527	2.79281	0.00522528	0.037476	100037396	Mus musculus	RIKEN cDNA D030047H15 gene(D030047H15Rik)
Hivep2	2426.7	0.548401	0.0484002	11.3305	9.26327e-30	1.35346e-25	15273	Mus musculus	human immunodeficiency virus type I enhancer binding protein 2(Hivep2)
Rad51	75.5351	0.54438	0.180013	3.02412	0.00249359	0.0216997	19361	Mus musculus	RAD51 recombinase(Rad51)
AI506816	146.875	0.540552	0.198524	2.72286	0.00647192	0.0439006	433855	Mus musculus	expressed sequence AI506816(AI506816)
Dnajc3	9631.18	0.537108	0.108249	4.96179	6.98448e-07	3.76569e-05	100037258	Mus musculus	DnaJ heat shock protein family (Hsp40) member C3(Dnajc3)
Gins3	112.71	0.535605	0.127207	4.21049	2.54816e-05	0.00065896	78833	Mus musculus	GINS complex subunit 3(Gins3)
9530080O11Rik	51.1092	0.534557	0.178542	2.99402	0.00275327	0.0234566	319247	Mus musculus	RIKEN cDNA 9530080O11 gene(9530080O11Rik)
Sik1	1039.89	0.534209	0.153343	3.48375	0.000494441	0.00647337	17691	Mus musculus	salt inducible kinase 1(Sik1)
Hells	194.395	0.533804	0.149977	3.55924	0.000371923	0.00523019	15201	Mus musculus	helicase, lymphoid specific(Hells)
Calr	18284.2	0.532673	0.121642	4.37903	1.19209e-05	0.000358386	12317	Mus musculus	calreticulin(Calr)
Amigo3	578.075	0.530499	0.101744	5.21404	1.84771e-07	1.33181e-05	320844	Mus musculus	adhesion molecule with Ig like domain 3(Amigo3)
Hapln1	2405.65	0.529586	0.103579	5.11285	3.17335e-07	2.02566e-05	12950	Mus musculus	hyaluronan and proteoglycan link protein 1(Hapln1)
Nefh	198.695	0.528902	0.116593	4.53633	5.72423e-06	0.00019992	380684	Mus musculus	neurofilament, heavy polypeptide(Nefh)
Cenpk	61.4429	0.52571	0.196453	2.67601	0.00745053	0.0485817	60411	Mus musculus	centromere protein K(Cenpk)
Exo1	111.596	0.524115	0.133111	3.93742	8.23622e-05	0.00162621	26909	Mus musculus	exonuclease 1(Exo1)
Mcm10	90.9773	0.519451	0.134291	3.86809	0.000109691	0.00203388	70024	Mus musculus	minichromosome maintenance 10 replication initiation factor(Mcm10)
Ercc6l	73.586	0.519448	0.178815	2.90494	0.00367323	0.0287618	236930	Mus musculus	excision repair cross-complementing rodent repair deficiency complementation group 6 like(Ercc6l)
Tcf19	162.823	0.519152	0.160274	3.23915	0.00119885	0.0125296	106795	Mus musculus	transcription factor 19(Tcf19)
Gmds	759.64	0.518082	0.084128	6.15825	7.35512e-10	1.29477e-07	218138	Mus musculus	GDP-mannose 4, 6-dehydratase(Gmds)
Vipr1	1456.26	0.517378	0.0584925	8.84521	9.13582e-19	1.11236e-15	22354	Mus musculus	vasoactive intestinal peptide receptor 1(Vipr1)
Ppib	225.137	0.51708	0.161869	3.19444	0.00140104	0.0141567	19035	Mus musculus	peptidylprolyl isomerase B(Ppib)
Rad18	338.846	0.514312	0.154147	3.3365	0.000848402	0.00971473	58186	Mus musculus	RAD18 E3 ubiquitin protein ligase(Rad18)
Clspn	132.404	0.512091	0.131929	3.88157	0.000103786	0.0019592	269582	Mus musculus	claspin(Clspn)
Ssr2	4441.81	0.511132	0.0974499	5.24507	1.56221e-07	1.17368e-05	66256	Mus musculus	signal sequence receptor, beta(Ssr2)
Pcdhb15	92.1898	0.509613	0.143306	3.55613	0.000376361	0.00526221	93886	Mus musculus	protocadherin beta 15(Pcdhb15)
B3galt4	140.4	0.508511	0.123783	4.1081	3.9893e-05	0.0009371	54218	Mus musculus	UDP-Gal:betaGlcNAc beta 1,3-galactosyltransferase, polypeptide 4(B3galt4)
P2ry1	1732.83	0.508416	0.136839	3.71542	0.000202865	0.00325722	18441	Mus musculus	purinergic receptor P2Y, G-protein coupled 1(P2ry1)
Srm	1054.14	0.50641	0.110249	4.59334	4.36206e-06	0.000161302	20810	Mus musculus	spermidine synthase(Srm)
Mrps12	343.069	0.50178	0.10106	4.96519	6.86326e-07	3.72785e-05	24030	Mus musculus	mitochondrial ribosomal protein S12(Mrps12)
Cntn1	2302.37	0.500546	0.0866829	5.77445	7.72038e-09	9.80891e-07	12805	Mus musculus	contactin 1(Cntn1)
Uba5	1780.33	0.500141	0.117416	4.25958	2.04811e-05	0.000555194	66663	Mus musculus	ubiquitin-like modifier activating enzyme 5(Uba5)
Plekha7	319.764	-0.5001	0.101705	-4.91715	8.78151e-07	4.55461e-05	233765	Mus musculus	pleckstrin homology domain containing, family A member 7(Plekha7)
Myo9a	2854.32	-0.50301	0.100546	-5.00281	5.65018e-07	3.19544e-05	270163	Mus musculus	myosin IXa(Myo9a)
Fv1	79.7482	-0.505614	0.1606	-3.14829	0.00164231	0.0159865	14349	Mus musculus	Friend virus susceptibility 1(Fv1)
Tspan2os	57.421	-0.507937	0.1763	-2.8811	0.00396286	0.0304584	78491	Mus musculus	tetraspanin 2, opposite strand(Tspan2os)
Zkscan16	1944.12	-0.510479	0.142255	-3.58848	0.000332616	0.00477392	100041581	Mus musculus	zinc finger with KRAB and SCAN domains 16(Zkscan16)
Stard8	137.392	-0.510949	0.170197	-3.00211	0.00268115	0.0230132	236920	Mus musculus	StAR related lipid transfer domain containing 8(Stard8)
Adgrv1	1427.06	-0.512639	0.155415	-3.29852	0.000971946	0.0106615	110789	Mus musculus	adhesion G protein-coupled receptor V1(Adgrv1)
Ddit3	530.829	-0.514059	0.145925	-3.52276	0.000427077	0.00580892	13198	Mus musculus	DNA-damage inducible transcript 3(Ddit3)
6430571L13Rik	58.7143	-0.514852	0.175913	-2.92675	0.00342529	0.027229	235599	Mus musculus	RIKEN cDNA 6430571L13 gene(6430571L13Rik)
Dnah7b	125.677	-0.522182	0.158749	-3.28935	0.00100419	0.0109495	227058	Mus musculus	dynein, axonemal, heavy chain 7B(Dnah7b)
Adh1	1868.1	-0.52616	0.0856203	-6.14527	7.98254e-10	1.37215e-07	11522	Mus musculus	alcohol dehydrogenase 1 (class I)(Adh1)
H1f3	1350.02	-0.527421	0.116999	-4.50792	6.54678e-06	0.00022423	14957	Mus musculus	H1.3 linker histone, cluster member(H1f3)
N4bp2l1	327.264	-0.527446	0.113087	-4.66408	3.09997e-06	0.000124092	100637	Mus musculus	NEDD4 binding protein 2-like 1(N4bp2l1)
Cyp4f39	304.118	-0.531309	0.135656	-3.91658	8.98137e-05	0.00174854	320997	Mus musculus	cytochrome P450, family 4, subfamily f, polypeptide 39(Cyp4f39)
Flrt1	953.376	-0.532374	0.116152	-4.58341	4.57443e-06	0.000166817	396184	Mus musculus	fibronectin leucine rich transmembrane protein 1(Flrt1)
Wnt4	3034.89	-0.534364	0.0908039	-5.88481	3.98518e-09	5.7651e-07	22417	Mus musculus	wingless-type MMTV integration site family, member 4(Wnt4)
Zbtb40	1401.75	-0.534376	0.123261	-4.33534	1.45535e-05	0.00041941	230848	Mus musculus	zinc finger and BTB domain containing 40(Zbtb40)
Rpia	573.959	-0.535162	0.132553	-4.03736	5.40563e-05	0.00117883	19895	Mus musculus	ribose 5-phosphate isomerase A(Rpia)
Catsperd	88.3567	-0.536127	0.186556	-2.87381	0.00405554	0.0309914	106757	Mus musculus	cation channel sperm associated auxiliary subunit delta(Catsperd)
4930562C15Rik	66.2499	-0.536454	0.172025	-3.11846	0.00181799	0.0172822	78809	Mus musculus	RIKEN cDNA 4930562C15 gene(4930562C15Rik)
Col6a6	2117.03	-0.537233	0.175596	-3.05949	0.00221717	0.0199933	245026	Mus musculus	collagen, type VI, alpha 6(Col6a6)
Jph3	686.296	-0.537546	0.10351	-5.19316	2.06753e-07	1.43169e-05	57340	Mus musculus	junctophilin 3(Jph3)
Rorc	939.075	-0.539634	0.0881124	-6.12439	9.10324e-10	1.5466e-07	19885	Mus musculus	RAR-related orphan receptor gamma(Rorc)
Fam221a	109.772	-0.540602	0.132187	-4.08967	4.31982e-05	0.000992405	231946	Mus musculus	family with sequence similarity 221, member A(Fam221a)
Ociad2	1936.42	-0.540664	0.136183	-3.97014	7.18295e-05	0.00146374	433904	Mus musculus	OCIA domain containing 2(Ociad2)
Cox7a2l	2161.47	-0.544212	0.0737923	-7.37492	1.64441e-13	7.28075e-11	20463	Mus musculus	cytochrome c oxidase subunit 7A2 like(Cox7a2l)
Ccdc163	138.534	-0.54556	0.127379	-4.28296	1.84422e-05	0.000510338	68394	Mus musculus	coiled-coil domain containing 163(Ccdc163)
Dcaf12l1	673.01	-0.545774	0.104523	-5.22156	1.77424e-07	1.28972e-05	245404	Mus musculus	DDB1 and CUL4 associated factor 12-like 1(Dcaf12l1)
Slc35d3	465.04	-0.546756	0.107855	-5.06935	3.99187e-07	2.46098e-05	76157	Mus musculus	solute carrier family 35, member D3(Slc35d3)
Coq8a	416.218	-0.549	0.122154	-4.49432	6.9793e-06	0.000235507	67426	Mus musculus	coenzyme Q8A(Coq8a)
Grin2c	150.487	-0.549359	0.196096	-2.80148	0.00508685	0.036667	14813	Mus musculus	glutamate receptor, ionotropic, NMDA2C (epsilon 3)(Grin2c)
Flcn	1594.36	-0.549902	0.144204	-3.81335	0.000137097	0.00241922	216805	Mus musculus	folliculin(Flcn)
Sult1d1	452.542	-0.552754	0.121304	-4.55677	5.19472e-06	0.000184673	53315	Mus musculus	sulfotransferase family 1D, member 1(Sult1d1)
Lrrc71	73.7295	-0.554047	0.164871	-3.36049	0.000778039	0.00910121	74485	Mus musculus	leucine rich repeat containing 71(Lrrc71)
Kcnq4	299.991	-0.560299	0.154305	-3.63111	0.000282203	0.00421602	60613	Mus musculus	potassium voltage-gated channel, subfamily Q, member 4(Kcnq4)
Klhl24	1727.57	-0.560317	0.0881799	-6.35425	2.0944e-10	4.31029e-08	75785	Mus musculus	kelch-like 24(Klhl24)
Calcoco1	1001.88	-0.561308	0.121845	-4.60674	4.09036e-06	0.000153636	67488	Mus musculus	calcium binding and coiled coil domain 1(Calcoco1)
Rnasel	90.2696	-0.562475	0.14674	-3.83315	0.000126515	0.00225703	24014	Mus musculus	ribonuclease L (2', 5'-oligoisoadenylate synthetase-dependent)(Rnasel)
Appl2	2182.37	-0.563926	0.0982552	-5.73941	9.50097e-09	1.18648e-06	216190	Mus musculus	adaptor protein, phosphotyrosine interaction, PH domain and leucine zipper containing 2(Appl2)
Ceacam2	54.1175	-0.565567	0.205807	-2.74804	0.00599529	0.0415589	26367	Mus musculus	CEA cell adhesion molecule 2(Ceacam2)
Trpm2	547.068	-0.567834	0.0781224	-7.26852	3.63448e-13	1.38861e-10	28240	Mus musculus	transient receptor potential cation channel, subfamily M, member 2(Trpm2)
Ggnbp1	149.211	-0.567906	0.118779	-4.78122	1.74237e-06	8.01413e-05	70772	Mus musculus	gametogenetin binding protein 1(Ggnbp1)
Gm4922	51.8413	-0.569349	0.16582	-3.43354	0.000595764	0.00744629	237300	Mus musculus	predicted gene 4922(Gm4922)
Per3	1234.87	-0.569919	0.0970067	-5.87505	4.22725e-09	5.99653e-07	18628	Mus musculus	period circadian clock 3(Per3)
Mlxipl	6868.24	-0.569957	0.1557	-3.66061	0.000251613	0.00385762	58805	Mus musculus	MLX interacting protein-like(Mlxipl)
Aqp7	81.9648	-0.573017	0.136731	-4.19084	2.77924e-05	0.000701283	11832	Mus musculus	aquaporin 7(Aqp7)
Rit2	143.907	-0.5736	0.144833	-3.96042	7.48169e-05	0.00151616	19762	Mus musculus	Ras-like without CAAX 2(Rit2)
Mapk15	488.799	-0.576065	0.112262	-5.13144	2.8754e-07	1.89245e-05	332110	Mus musculus	mitogen-activated protein kinase 15(Mapk15)
Crebrf	2795.36	-0.577094	0.108435	-5.32201	1.02625e-07	8.37299e-06	77128	Mus musculus	CREB3 regulatory factor(Crebrf)
Cfap47	247.088	-0.584706	0.0917044	-6.37599	1.81784e-10	3.96426e-08	636104	Mus musculus	cilia and flagella associated protein 47(Cfap47)
Klf11	656.229	-0.585654	0.150342	-3.89547	9.80079e-05	0.00186944	194655	Mus musculus	Kruppel-like transcription factor 11(Klf11)
Rnf122	61.0075	-0.5888	0.219791	-2.6789	0.00738634	0.0483304	68867	Mus musculus	ring finger protein 122(Rnf122)
Mgam	212.166	-0.590467	0.16725	-3.53044	0.000414876	0.0056893	232714	Mus musculus	maltase-glucoamylase(Mgam)
Uap1l1	610.478	-0.59725	0.133898	-4.46048	8.17747e-06	0.000264925	227620	Mus musculus	UDP-N-acteylglucosamine pyrophosphorylase 1-like 1(Uap1l1)
Gstt1	452.436	-0.601634	0.131131	-4.58805	4.47396e-06	0.000164512	14871	Mus musculus	glutathione S-transferase, theta 1(Gstt1)
Socs2	466.855	-0.610366	0.132275	-4.61438	3.94263e-06	0.000150407	216233	Mus musculus	suppressor of cytokine signaling 2(Socs2)
Rnf182	262.245	-0.61045	0.180864	-3.37519	0.000737645	0.0087416	328234	Mus musculus	ring finger protein 182(Rnf182)
Jakmip1	1114.21	-0.613272	0.180613	-3.3955	0.000685022	0.00829234	76071	Mus musculus	janus kinase and microtubule interacting protein 1(Jakmip1)
Grip2	56.8133	-0.614338	0.214261	-2.86724	0.00414068	0.0314774	243547	Mus musculus	glutamate receptor interacting protein 2(Grip2)
Gm15511	56.2498	-0.616358	0.179139	-3.44066	0.000580295	0.00730921	102642202	Mus musculus	predicted gene 15511(Gm15511)
D930015M05Rik	148.565	-0.619455	0.125333	-4.94249	7.71327e-07	4.08328e-05	320507	Mus musculus	RIKEN cDNA D930015M05 gene(D930015M05Rik)
Krt80	186.648	-0.620591	0.207227	-2.99473	0.00274685	0.0234429	74127	Mus musculus	keratin 80(Krt80)
Gm17767	210.365	-0.620822	0.170142	-3.64886	0.00026341	0.00398238	100045066	Mus musculus	predicted gene, 17767(Gm17767)
Ang	562.009	-0.622453	0.0977843	-6.36557	1.9456e-10	4.11989e-08	11727	Mus musculus	angiogenin, ribonuclease, RNase A family, 5(Ang)
2410021H03Rik	731.842	-0.622735	0.148401	-4.19629	2.71323e-05	0.000691849	69750	Mus musculus	RIKEN cDNA 2410021H03 gene(2410021H03Rik)
Aqp4	543.365	-0.625432	0.131794	-4.74551	2.07977e-06	9.07092e-05	11829	Mus musculus	aquaporin 4(Aqp4)
Dll1	184.656	-0.628405	0.165984	-3.78594	0.000153129	0.00264465	13388	Mus musculus	delta like canonical Notch ligand 1(Dll1)
AA388235	85.7972	-0.629219	0.233845	-2.69075	0.00712923	0.0471763	433100	Mus musculus	expressed sequence AA388235(AA388235)
Fn3k	300.717	-0.629456	0.206249	-3.05192	0.00227382	0.0203821	63828	Mus musculus	fructosamine 3 kinase(Fn3k)
Vwa5b1	171.239	-0.633902	0.154507	-4.10275	4.08268e-05	0.000954433	75718	Mus musculus	von Willebrand factor A domain containing 5B1(Vwa5b1)
Jade2	1539.28	-0.635127	0.116518	-5.45089	5.01182e-08	4.57673e-06	76901	Mus musculus	jade family PHD finger 2(Jade2)
Nabp1	595.985	-0.637224	0.116633	-5.46348	4.66896e-08	4.3176e-06	109019	Mus musculus	nucleic acid binding protein 1(Nabp1)
Tgfbr3	602.328	-0.637708	0.114108	-5.58865	2.28846e-08	2.40551e-06	21814	Mus musculus	transforming growth factor, beta receptor III(Tgfbr3)
Gdpd3	71.4658	-0.641331	0.149956	-4.27678	1.89617e-05	0.000522734	68616	Mus musculus	glycerophosphodiester phosphodiesterase domain containing 3(Gdpd3)
Gm30551	81.0029	-0.64797	0.149205	-4.34283	1.40661e-05	0.000408587	102632492	Mus musculus	predicted gene, 30551(Gm30551)
Mxra7	152.547	-0.648436	0.20405	-3.17783	0.00148381	0.0147383	67622	Mus musculus	matrix-remodelling associated 7(Mxra7)
Tmem151b	182.465	-0.651721	0.125436	-5.19563	2.04022e-07	1.41951e-05	210573	Mus musculus	transmembrane protein 151B(Tmem151b)
Gm1043	385.514	-0.654491	0.214173	-3.0559	0.00224384	0.0201628	381634	Mus musculus	predicted gene 1043(Gm1043)
Casq1	32.6014	-0.657694	0.246309	-2.6702	0.00758072	0.0492275	12372	Mus musculus	calsequestrin 1(Casq1)
Zdhhc2	6414.17	-0.660364	0.211433	-3.12328	0.00178845	0.0170569	70546	Mus musculus	zinc finger, DHHC domain containing 2(Zdhhc2)
Gcgr	446.43	-0.664097	0.158205	-4.1977	2.69642e-05	0.000688766	14527	Mus musculus	glucagon receptor(Gcgr)
Slc12a7	3029.18	-0.666207	0.160049	-4.16252	3.1475e-05	0.000775517	20499	Mus musculus	solute carrier family 12, member 7(Slc12a7)
A330032B11Rik	28.2414	-0.667646	0.224391	-2.97537	0.00292635	0.0242948	319931	Mus musculus	RIKEN cDNA A330032B11 gene(A330032B11Rik)
Ppil6	103.893	-0.670453	0.193969	-3.45649	0.000547252	0.00698942	73075	Mus musculus	peptidylprolyl isomerase (cyclophilin)-like 6(Ppil6)
Pzp	38.2909	-0.672562	0.216408	-3.10784	0.00188458	0.0177534	11287	Mus musculus	PZP, alpha-2-macroglobulin like(Pzp)
Lrrc36	222.176	-0.677598	0.147698	-4.58771	4.48128e-06	0.000164512	270091	Mus musculus	leucine rich repeat containing 36(Lrrc36)
Mir199a-1	26.7817	-0.680691	0.247704	-2.74801	0.00599591	0.0415589	387194	Mus musculus	microRNA 199a-1(Mir199a-1)
Cdkl1	570.694	-0.68126	0.172504	-3.94925	7.83968e-05	0.00156483	71091	Mus musculus	cyclin dependent kinase like 1(Cdkl1)
Scn1b	97.0704	-0.692732	0.164485	-4.21153	2.53642e-05	0.000658341	20266	Mus musculus	sodium channel, voltage-gated, type I, beta(Scn1b)
Nfam1	39.0507	-0.697657	0.20394	-3.42089	0.000624173	0.00774176	74039	Mus musculus	Nfat activating molecule with ITAM motif 1(Nfam1)
H3c4	165.318	-0.697779	0.128661	-5.4234	5.84763e-08	5.20974e-06	319149	Mus musculus	H3 clustered histone 4(H3c4)
Sord	298.396	-0.69988	0.0871621	-8.02963	9.7767e-16	6.21075e-13	20322	Mus musculus	sorbitol dehydrogenase(Sord)
Zim1	3626.4	-0.703596	0.086743	-8.11127	5.00938e-16	3.48533e-13	22776	Mus musculus	zinc finger, imprinted 1(Zim1)
Tbx6	53.9342	-0.706655	0.206818	-3.4168	0.000633624	0.00781256	21389	Mus musculus	T-box 6(Tbx6)
Fbxo32	838.435	-0.710021	0.136948	-5.18459	2.16494e-07	1.48887e-05	67731	Mus musculus	F-box protein 32(Fbxo32)
Khk	170.302	-0.711422	0.18875	-3.76912	0.000163826	0.00275134	16548	Mus musculus	ketohexokinase(Khk)
Neil2	315.082	-0.715562	0.117453	-6.09235	1.11268e-09	1.86866e-07	382913	Mus musculus	nei like 2 (E. coli)(Neil2)
Cfap54	258.989	-0.724579	0.205218	-3.53077	0.000414344	0.0056893	380654	Mus musculus	cilia and flagella associated protein 54(Cfap54)
Btg2	3945.9	-0.734428	0.0696976	-10.5373	5.81145e-26	2.12278e-22	12227	Mus musculus	BTG anti-proliferation factor 2(Btg2)
Cnr1	435.333	-0.736067	0.250455	-2.93892	0.00329354	0.0264843	12801	Mus musculus	cannabinoid receptor 1(Cnr1)
Dbp	309.405	-0.740435	0.139249	-5.31734	1.05293e-07	8.49963e-06	13170	Mus musculus	D site albumin promoter binding protein(Dbp)
Fnip2	3988.22	-0.742023	0.155873	-4.76042	1.93192e-06	8.58737e-05	329679	Mus musculus	folliculin interacting protein 2(Fnip2)
Acad12	134.92	-0.74379	0.165979	-4.48124	7.42123e-06	0.000246435	338350	Mus musculus	acyl-Coenzyme A dehydrogenase family, member 12(Acad12)
Aloxe3	43.688	-0.744383	0.197886	-3.76168	0.000168778	0.00282475	23801	Mus musculus	arachidonate lipoxygenase 3(Aloxe3)
Plk5	26.6849	-0.758127	0.265215	-2.85854	0.00425594	0.0320368	216166	Mus musculus	polo like kinase 5(Plk5)
Mettl27	326.316	-0.759593	0.133968	-5.66994	1.42848e-08	1.64343e-06	79565	Mus musculus	methyltransferase like 27(Mettl27)
Celsr1	453.73	-0.765946	0.165685	-4.62291	3.7839e-06	0.000145109	12614	Mus musculus	cadherin, EGF LAG seven-pass G-type receptor 1(Celsr1)
B4galnt3	56.9734	-0.767365	0.253232	-3.03029	0.00244323	0.0213505	330406	Mus musculus	beta-1,4-N-acetyl-galactosaminyl transferase 3(B4galnt3)
Tsga10	327.883	-0.784709	0.222586	-3.52542	0.000422819	0.00576725	211484	Mus musculus	testis specific 10(Tsga10)
Cdh23	294.008	-0.785062	0.262573	-2.98988	0.00279084	0.02368	22295	Mus musculus	cadherin related 23 (otocadherin)(Cdh23)
Itpr2	1285.03	-0.810195	0.273093	-2.96674	0.00300974	0.0247888	16439	Mus musculus	inositol 1,4,5-triphosphate receptor 2(Itpr2)
H2ac6	117.276	-0.83292	0.177644	-4.68871	2.74936e-06	0.00011284	319164	Mus musculus	H2A clustered histone 6(H2ac6)
Emid1	101.351	-0.83727	0.291206	-2.87518	0.00403799	0.0308895	140703	Mus musculus	EMI domain containing 1(Emid1)
Mir1192	51.6638	-0.839177	0.224418	-3.73934	0.000184502	0.00303236	100316672	Mus musculus	microRNA 1192(Mir1192)
Dcdc2a	493.104	-0.845599	0.176017	-4.80409	1.55459e-06	7.3747e-05	195208	Mus musculus	doublecortin domain containing 2a(Dcdc2a)
Atf3	203.719	-0.848305	0.292698	-2.89822	0.00375282	0.029244	11910	Mus musculus	activating transcription factor 3(Atf3)
Slc23a4	58.5009	-0.849881	0.30027	-2.83039	0.00464918	0.034273	243753	Mus musculus	solute carrier family 23 member 4(Slc23a4)
Sult1c2	200.592	-0.850053	0.245346	-3.4647	0.000530816	0.00682124	69083	Mus musculus	sulfotransferase family, cytosolic, 1C, member 2(Sult1c2)
4930552P12Rik	22.719	-0.852965	0.2901	-2.94024	0.00327958	0.0264218	77594	Mus musculus	RIKEN cDNA 4930552P12 gene(4930552P12Rik)
Kynu	27.0793	-0.88558	0.252309	-3.5099	0.000448276	0.00602554	70789	Mus musculus	kynureninase(Kynu)
Cryl1	391.73	-0.886058	0.237825	-3.72567	0.000194797	0.00314843	68631	Mus musculus	crystallin, lambda 1(Cryl1)
Nek5	132.979	-0.888576	0.21371	-4.15785	3.21258e-05	0.000782316	330721	Mus musculus	NIMA (never in mitosis gene a)-related expressed kinase 5(Nek5)
Fcgbp	30.8358	-0.890106	0.323893	-2.74815	0.00599332	0.0415589	215384	Mus musculus	Fc fragment of IgG binding protein(Fcgbp)
Fbxo40	29.6871	-0.894668	0.265168	-3.37397	0.000740926	0.00876572	207215	Mus musculus	F-box protein 40(Fbxo40)
Kcnj12	334.175	-0.897873	0.230948	-3.88777	0.00010117	0.00192223	16515	Mus musculus	potassium inwardly-rectifying channel, subfamily J, member 12(Kcnj12)
Kcng3	563.073	-0.908969	0.316583	-2.87119	0.00408932	0.0311792	225030	Mus musculus	potassium voltage-gated channel, subfamily G, member 3(Kcng3)
6430550D23Rik	37.4159	-0.910685	0.208296	-4.37208	1.2307e-05	0.000366973	320095	Mus musculus	RIKEN cDNA 6430550D23 gene(6430550D23Rik)
Ifit3	21.4356	-0.920471	0.340035	-2.70699	0.00678963	0.0454644	15959	Mus musculus	interferon-induced protein with tetratricopeptide repeats 3(Ifit3)
Cabp4	21.3519	-0.929128	0.338495	-2.74488	0.00605339	0.0418185	73660	Mus musculus	calcium binding protein 4(Cabp4)
Ikzf1	20.4917	-0.94048	0.324395	-2.89918	0.00374143	0.0291863	22778	Mus musculus	IKAROS family zinc finger 1(Ikzf1)
T2	155.04	-0.948126	0.311509	-3.04365	0.00233723	0.0207595	21331	Mus musculus	brachyury 2(T2)
H1f6	33.6939	-0.953906	0.293265	-3.25272	0.00114308	0.0120501	107970	Mus musculus	H1.6 linker histone, cluster member(H1f6)
Mreg	498.351	-0.972787	0.170457	-5.70694	1.15025e-08	1.40052e-06	381269	Mus musculus	melanoregulin(Mreg)
Tnn	30.7959	-0.981748	0.297775	-3.29694	0.000977438	0.0106976	329278	Mus musculus	tenascin N(Tnn)
Fmo2	93.8381	-0.993936	0.226196	-4.39413	1.11216e-05	0.000339953	55990	Mus musculus	flavin containing monooxygenase 2(Fmo2)
Jun	1471.28	-0.994942	0.140628	-7.07498	1.49473e-12	4.96354e-10	16476	Mus musculus	jun proto-oncogene(Jun)
5730420D15Rik	25.2092	-1.01232	0.315356	-3.21009	0.00132692	0.0136054	70523	Mus musculus	RIKEN cDNA 5730420D15 gene(5730420D15Rik)
Ier2	326.375	-1.03712	0.0981172	-10.5702	4.09416e-26	1.99399e-22	15936	Mus musculus	immediate early response 2(Ier2)
H2ac7	82.8162	-1.03885	0.243076	-4.27379	1.9218e-05	0.00052697	319165	Mus musculus	H2A clustered histone 7(H2ac7)
Myo3a	136.983	-1.04142	0.313938	-3.31729	0.000908959	0.010216	667663	Mus musculus	myosin IIIA(Myo3a)
Gpt2	427.252	-1.04567	0.141963	-7.36582	1.76067e-13	7.56623e-11	108682	Mus musculus	glutamic pyruvate transaminase (alanine aminotransferase) 2(Gpt2)
Txlnb	26.4367	-1.06185	0.313762	-3.38425	0.000713743	0.00854794	378431	Mus musculus	taxilin beta(Txlnb)
Dusp1	1065.93	-1.06441	0.146239	-7.27855	3.37425e-13	1.35256e-10	19252	Mus musculus	dual specificity phosphatase 1(Dusp1)
Fos	3258.11	-1.16087	0.204337	-5.68117	1.33779e-08	1.60217e-06	14281	Mus musculus	FBJ osteosarcoma oncogene(Fos)
Egr1	3664.52	-1.22546	0.163894	-7.47713	7.59629e-14	3.69965e-11	13653	Mus musculus	early growth response 1(Egr1)
Cib3	101.452	-1.22857	0.341484	-3.59773	0.00032101	0.0046432	234421	Mus musculus	calcium and integrin binding family member 3(Cib3)
Dok7	49.2328	-1.28475	0.37909	-3.38903	0.000701409	0.00844871	231134	Mus musculus	docking protein 7(Dok7)
Slc28a2b	115.806	-1.30902	0.386876	-3.38355	0.000715544	0.00855462	381417	Mus musculus	solute carrier family 28 member 2b(Slc28a2b)
Insyn2a	103.602	-1.38391	0.264971	-5.22287	1.76171e-07	1.28702e-05	627214	Mus musculus	inhibitory synaptic factor 2A(Insyn2a)
Ifit3b	20.6038	-1.39419	0.427145	-3.26398	0.0010986	0.0117594	667370	Mus musculus	interferon-induced protein with tetratricopeptide repeats 3B(Ifit3b)
Vipr2	62.149	-1.43084	0.246286	-5.80967	6.25944e-09	8.31424e-07	22355	Mus musculus	vasoactive intestinal peptide receptor 2(Vipr2)
Mcoln3	64.8228	-1.48433	0.335065	-4.42997	9.42466e-06	0.000300008	171166	Mus musculus	mucolipin 3(Mcoln3)
Iqcn	355.354	-1.48727	0.178695	-8.32299	8.57702e-17	6.59573e-14	637079	Mus musculus	IQ motif containing N(Iqcn)
Chp2	26.0261	-1.7149	0.418279	-4.09988	4.13356e-05	0.000962547	70261	Mus musculus	calcineurin-like EF hand protein 2(Chp2)
Fosb	1078.87	-1.88677	0.326552	-5.77784	7.56669e-09	9.69797e-07	14282	Mus musculus	FBJ osteosarcoma oncogene B(Fosb)

## Sheet: Supplementary Table 2
				List of Differentially Expressed Genes ( Gpt2βKO vs. Gpt2f/f ) under GLT conditions
gene_symbol	baseMean	log2FoldChange	lfcSE	stat	pvalue	padj	Entrez_id	Species	Gene.Name
Sprr1a	247.679	-3.84687	0.725707	-5.30087	1.15e-07	1.01e-05	20753	Mus musculus	small proline-rich protein 1A(Sprr1a)
Tnfsf15	17.6006	-3.66201	0.654557	-5.59463	2.21e-08	2.33e-06	326623	Mus musculus	tumor necrosis factor (ligand) superfamily, member 15(Tnfsf15)
Cxcl10	40.8582	-3.45201	0.39481	-8.74348	2.26e-18	3.26e-15	15945	Mus musculus	C-X-C motif chemokine ligand 10(Cxcl10)
Cldn11	449.733	-3.36815	0.84509	-3.98556	6.73e-05	0.00191719	18417	Mus musculus	claudin 11(Cldn11)
Gm19410	412.772	-3.03285	0.67268	-4.5086	6.53e-06	0.000308579	100502846	Mus musculus	predicted gene, 19410(Gm19410)
Wdr72	299.927	-2.98516	0.777793	-3.83798	0.00012405	0.00307404	546144	Mus musculus	WD repeat domain 72(Wdr72)
Acox2	49.9908	-2.75755	0.734457	-3.75454	0.000173657	0.00398294	93732	Mus musculus	acyl-Coenzyme A oxidase 2, branched chain(Acox2)
Hhipl1	26.8396	-2.5853	0.512854	-5.04101	4.63e-07	3.42e-05	214305	Mus musculus	hedgehog interacting protein-like 1(Hhipl1)
Klhl1	106.367	-2.37282	0.431432	-5.49987	3.8e-08	3.81e-06	93688	Mus musculus	kelch-like 1(Klhl1)
Glyat	19.2428	-2.26914	0.581478	-3.90236	9.53e-05	0.00252069	107146	Mus musculus	glycine-N-acyltransferase(Glyat)
Otog	26.1263	-2.18561	0.37071	-5.89573	3.73e-09	5.06e-07	18419	Mus musculus	otogelin(Otog)
Lama3	172.029	-2.1799	0.610943	-3.5681	0.000359585	0.00681832	16774	Mus musculus	laminin, alpha 3(Lama3)
2700089I24Rik	24.2395	-2.15853	0.479179	-4.50464	6.65e-06	0.000313418	72647	Mus musculus	RIKEN cDNA 2700089I24 gene(2700089I24Rik)
C130074G19Rik	28.1232	-1.98418	0.414006	-4.79263	1.65e-06	0.00010088	226777	Mus musculus	RIKEN cDNA C130074G19 gene(C130074G19Rik)
Anxa10	253.402	-1.95251	0.669381	-2.9169	0.00353531	0.0372587	26359	Mus musculus	annexin A10(Anxa10)
Slc5a10	224.737	-1.91859	0.513591	-3.73563	0.000187245	0.00421131	109342	Mus musculus	solute carrier family 5 (sodium/glucose cotransporter), member 10(Slc5a10)
Star	1626.63	-1.82014	0.312748	-5.81982	5.89e-09	7.28e-07	20845	Mus musculus	steroidogenic acute regulatory protein(Star)
Cyb5r2	39.941	-1.79455	0.39622	-4.52918	5.92e-06	0.00028892	320635	Mus musculus	cytochrome b5 reductase 2(Cyb5r2)
Soat2	18.2658	-1.79414	0.409587	-4.38035	1.18e-05	0.000511366	223920	Mus musculus	sterol O-acyltransferase 2(Soat2)
Plat	543.057	-1.78024	0.445355	-3.99735	6.41e-05	0.00185515	18791	Mus musculus	plasminogen activator, tissue(Plat)
Cd40	67.8311	-1.75699	0.249995	-7.02809	2.09e-12	8.23e-10	21939	Mus musculus	CD40 antigen(Cd40)
Atf3	436.786	-1.69408	0.329777	-5.13704	2.79e-07	2.24e-05	11910	Mus musculus	activating transcription factor 3(Atf3)
Aldob	56.4901	-1.67493	0.58415	-2.8673	0.00413987	0.0416911	230163	Mus musculus	aldolase B, fructose-bisphosphate(Aldob)
Gulo	28.194	-1.65337	0.499457	-3.31033	0.000931853	0.0143199	268756	Mus musculus	gulonolactone (L-) oxidase(Gulo)
Gpt2	590.227	-1.61445	0.130859	-12.3373	5.71e-35	4.37e-31	108682	Mus musculus	glutamic pyruvate transaminase (alanine aminotransferase) 2(Gpt2)
Steap1	126.372	-1.61219	0.377877	-4.26645	1.99e-05	0.000752167	70358	Mus musculus	six transmembrane epithelial antigen of the prostate 1(Steap1)
Trib3	657.728	-1.57483	0.239205	-6.5836	4.59e-11	1.1e-08	228775	Mus musculus	tribbles pseudokinase 3(Trib3)
Tcf7l1	72.8585	-1.56471	0.324628	-4.82001	1.44e-06	8.83e-05	21415	Mus musculus	transcription factor 7 like 1 (T cell specific, HMG box)(Tcf7l1)
Stc2	109.396	-1.4913	0.26237	-5.68397	1.32e-08	1.46e-06	20856	Mus musculus	stanniocalcin 2(Stc2)
Extl1	83.3083	-1.47132	0.243986	-6.03036	1.64e-09	2.41e-07	56219	Mus musculus	exostosin-like glycosyltransferase 1(Extl1)
Nptx2	1205.34	-1.45423	0.377109	-3.85626	0.000115137	0.00291573	53324	Mus musculus	neuronal pentraxin 2(Nptx2)
Bcat1	193.248	-1.45081	0.346963	-4.18146	2.9e-05	0.00100948	12035	Mus musculus	branched chain aminotransferase 1, cytosolic(Bcat1)
Slc7a11	979.906	-1.43309	0.15881	-9.02388	1.82e-19	3.48e-16	26570	Mus musculus	solute carrier family 7 (cationic amino acid transporter, y+ system), member 11(Slc7a11)
Nfkb2	413.99	-1.39776	0.123783	-11.2921	1.44e-29	7.34e-26	18034	Mus musculus	nuclear factor of kappa light polypeptide gene enhancer in B cells 2, p49/p100(Nfkb2)
Stbd1	135.799	-1.36773	0.250801	-5.45343	4.94e-08	4.88e-06	52331	Mus musculus	starch binding domain 1(Stbd1)
Ddit3	684.263	-1.33227	0.259439	-5.13518	2.82e-07	2.25e-05	13198	Mus musculus	DNA-damage inducible transcript 3(Ddit3)
Scube2	27.4029	-1.33077	0.393938	-3.37812	0.000729837	0.0118822	56788	Mus musculus	signal peptide, CUB domain, EGF-like 2(Scube2)
5033406O09Rik	26.3735	-1.32884	0.335512	-3.96064	7.47e-05	0.0020898	77675	Mus musculus	RIKEN cDNA 5033406O09 gene(5033406O09Rik)
Pde11a	21.109	-1.32665	0.345109	-3.84414	0.000120977	0.00302363	241489	Mus musculus	phosphodiesterase 11A(Pde11a)
Odc1	4871.35	-1.2695	0.208387	-6.09204	1.11e-09	1.82e-07	18263	Mus musculus	ornithine decarboxylase, structural 1(Odc1)
Ppp1r15a	1308.42	-1.25888	0.260929	-4.82462	1.4e-06	8.67e-05	17872	Mus musculus	protein phosphatase 1, regulatory subunit 15A(Ppp1r15a)
Rnf183	21.6063	-1.23409	0.352207	-3.50387	0.000458542	0.00826509	76072	Mus musculus	ring finger protein 183(Rnf183)
Tgm3	29.0924	-1.22506	0.280547	-4.36669	1.26e-05	0.000535348	21818	Mus musculus	transglutaminase 3, E polypeptide(Tgm3)
Cth	100.182	-1.21426	0.301787	-4.02359	5.73e-05	0.0017019	107869	Mus musculus	cystathionine gamma lyase(Cth)
Stx11	14.1575	-1.2102	0.39847	-3.03711	0.00238855	0.0283902	74732	Mus musculus	syntaxin 11(Stx11)
Vipr2	85.5281	-1.20815	0.227054	-5.32098	1.03e-07	9.24e-06	22355	Mus musculus	vasoactive intestinal peptide receptor 2(Vipr2)
Ipcef1	159.986	-1.19069	0.182954	-6.5081	7.61e-11	1.62e-08	320495	Mus musculus	interaction protein for cytohesin exchange factors 1(Ipcef1)
Relb	154.264	-1.18206	0.145577	-8.11982	4.67e-16	5.11e-13	19698	Mus musculus	avian reticuloendotheliosis viral (v-rel) oncogene related B(Relb)
Gsto1	378.651	-1.17565	0.193356	-6.08025	1.2e-09	1.9e-07	14873	Mus musculus	glutathione S-transferase omega 1(Gsto1)
Fcna	26.315	-1.16452	0.377864	-3.08184	0.00205726	0.0256013	14133	Mus musculus	ficolin A(Fcna)
Rnf152	446.556	-1.15959	0.322532	-3.59527	0.000324053	0.00630854	320311	Mus musculus	ring finger protein 152(Rnf152)
Trnp1	111.709	-1.15268	0.212829	-5.41601	6.09e-08	5.84e-06	69539	Mus musculus	TMF1-regulated nuclear protein 1(Trnp1)
Fbln5	123.163	-1.1257	0.251961	-4.46776	7.9e-06	0.00036149	23876	Mus musculus	fibulin 5(Fbln5)
Gpr3	33.1549	-1.11888	0.28505	-3.9252	8.67e-05	0.00234571	14748	Mus musculus	G-protein coupled receptor 3(Gpr3)
Cldn15	19.1563	-1.09051	0.343666	-3.17318	0.00150778	0.0204975	60363	Mus musculus	claudin 15(Cldn15)
Chac1	1328.75	-1.08823	0.13059	-8.3332	7.87e-17	1e-13	69065	Mus musculus	ChaC, cation transport regulator 1(Chac1)
Snora78	18.6914	-1.08636	0.320039	-3.39446	0.000687646	0.0114143	100306952	Mus musculus	small nucleolar RNA, H/ACA box 7(Snora78)
Pgpep1l	93.8923	-1.07999	0.212014	-5.09397	3.51e-07	2.69e-05	78444	Mus musculus	pyroglutamyl-peptidase I-like(Pgpep1l)
Hspa1a	406.293	-1.07372	0.374175	-2.86958	0.00411022	0.0414347	193740	Mus musculus	heat shock protein 1A(Hspa1a)
Guca1a	42.2269	-1.07274	0.252357	-4.25087	2.13e-05	0.000781181	14913	Mus musculus	guanylate cyclase activator 1a (retina)(Guca1a)
Fas	26.8789	-1.06648	0.373021	-2.85902	0.0042495	0.0425256	14102	Mus musculus	Fas cell surface death receptor(Fas)
Rsad2	303.018	-1.06115	0.289934	-3.65996	0.000252257	0.00528705	58185	Mus musculus	radical S-adenosyl methionine domain containing 2(Rsad2)
Fut1	86.3747	-1.05257	0.242428	-4.34179	1.41e-05	0.000583641	14343	Mus musculus	fucosyltransferase 1(Fut1)
Mycl	18.1444	-1.04963	0.326037	-3.21936	0.00128476	0.0181366	16918	Mus musculus	v-myc avian myelocytomatosis viral oncogene lung carcinoma derived(Mycl)
Klhl14	27.5604	-1.03613	0.307386	-3.37079	0.000749541	0.0121009	225266	Mus musculus	kelch-like 14(Klhl14)
Mfsd2a	154.193	-1.02313	0.349299	-2.9291	0.00339942	0.0362944	76574	Mus musculus	MFSD2 lysolipid transporter A, lysophospholipid(Mfsd2a)
Tlr5	72.1828	-0.985898	0.230527	-4.27671	1.9e-05	0.000726518	53791	Mus musculus	toll-like receptor 5(Tlr5)
Prss16	26.1209	-0.976751	0.312711	-3.12349	0.00178717	0.0232241	54373	Mus musculus	serine protease 16 (thymus)(Prss16)
Sfn	46.2168	-0.967656	0.309543	-3.12608	0.00177156	0.0231013	55948	Mus musculus	stratifin(Sfn)
Lrrc55	27.3192	-0.964808	0.327503	-2.94595	0.00321961	0.0349594	241528	Mus musculus	leucine rich repeat containing 55(Lrrc55)
Caps2	30.3106	-0.958749	0.277134	-3.45952	0.000541145	0.00940009	353025	Mus musculus	calcyphosphine 2(Caps2)
Zcchc12	634.704	-0.958451	0.132709	-7.22219	5.12e-13	2.38e-10	72693	Mus musculus	zinc finger, CCHC domain containing 12(Zcchc12)
Gsdma	1958.58	-0.949074	0.116456	-8.14963	3.65e-16	4.3e-13	57911	Mus musculus	gasdermin A(Gsdma)
Cutal	170.179	-0.943675	0.183711	-5.13675	2.8e-07	2.24e-05	77996	Mus musculus	cutA divalent cation tolerance homolog-like(Cutal)
Angptl6	72.6101	-0.934768	0.225536	-4.14465	3.4e-05	0.00113848	70726	Mus musculus	angiopoietin-like 6(Angptl6)
Lamc2	464.691	-0.922774	0.132873	-6.94479	3.79e-12	1.45e-09	16782	Mus musculus	laminin, gamma 2(Lamc2)
Fbp2	104.529	-0.92188	0.29862	-3.08714	0.00202093	0.0253377	14120	Mus musculus	fructose bisphosphatase 2(Fbp2)
Slc7a3	607.692	-0.918395	0.246896	-3.71977	0.000199402	0.00438941	11989	Mus musculus	solute carrier family 7 (cationic amino acid transporter, y+ system), member 3(Slc7a3)
Diras2	776.973	-0.899314	0.281499	-3.19473	0.00139962	0.0193359	68203	Mus musculus	DIRAS family, GTP-binding RAS-like 2(Diras2)
Ccdc33	49.2114	-0.896481	0.296851	-3.01996	0.00252804	0.0294989	382077	Mus musculus	coiled-coil domain containing 33(Ccdc33)
Tent5b	30.3141	-0.894722	0.296439	-3.01823	0.00254257	0.0295559	100342	Mus musculus	terminal nucleotidyltransferase 5B(Tent5b)
Klf4	461.723	-0.89345	0.170702	-5.23398	1.66e-07	1.43e-05	16600	Mus musculus	Kruppel-like transcription factor 4 (gut)(Klf4)
Acot12	36.7194	-0.892801	0.266307	-3.35252	0.000800789	0.0127139	74156	Mus musculus	acyl-CoA thioesterase 12(Acot12)
Ppara	71.6853	-0.884623	0.209724	-4.21803	2.46e-05	0.00088013	19013	Mus musculus	peroxisome proliferator activated receptor alpha(Ppara)
Mt2	1374.13	-0.87831	0.305111	-2.87865	0.00399377	0.0406241	17750	Mus musculus	metallothionein 2(Mt2)
Cyb5r1	580.244	-0.877957	0.173501	-5.06023	4.19e-07	3.16e-05	72017	Mus musculus	cytochrome b5 reductase 1(Cyb5r1)
2410006H16Rik	123.849	-0.876133	0.214282	-4.08869	4.34e-05	0.00137995	69221	Mus musculus	RIKEN cDNA 2410006H16 gene(2410006H16Rik)
S100a10	177.244	-0.875673	0.190389	-4.5994	4.24e-06	0.000223083	20194	Mus musculus	S100 calcium binding protein A10 (calpactin)(S100a10)
Mt3	101.028	-0.869863	0.192547	-4.51767	6.25e-06	0.000298416	17751	Mus musculus	metallothionein 3(Mt3)
Ier3	232.525	-0.866727	0.225592	-3.84202	0.000122028	0.00304493	15937	Mus musculus	immediate early response 3(Ier3)
Rorb	62.9761	-0.860284	0.275575	-3.12178	0.00179763	0.0232614	225998	Mus musculus	RAR-related orphan receptor beta(Rorb)
Nrip2	192.121	-0.844229	0.183871	-4.59143	4.4e-06	0.00022709	60345	Mus musculus	nuclear receptor interacting protein 2(Nrip2)
Vgf	6631.52	-0.840394	0.194423	-4.32249	1.54e-05	0.000620387	381677	Mus musculus	VGF nerve growth factor inducible(Vgf)
Mt1	2919.91	-0.835873	0.260657	-3.2068	0.00134222	0.0187287	17748	Mus musculus	metallothionein 1(Mt1)
Pvr	217.77	-0.832924	0.1678	-4.9638	6.91e-07	4.84e-05	52118	Mus musculus	poliovirus receptor(Pvr)
Ppp1r16b	116.762	-0.810281	0.206869	-3.91688	8.97e-05	0.00240685	228852	Mus musculus	protein phosphatase 1, regulatory subunit 16B(Ppp1r16b)
Sqstm1	11639.3	-0.808966	0.105009	-7.70381	1.32e-14	9.64e-12	18412	Mus musculus	sequestosome 1(Sqstm1)
Tc2n	247.651	-0.806502	0.220305	-3.66084	0.000251388	0.00527605	74413	Mus musculus	tandem C2 domains, nuclear(Tc2n)
Txnip	8447.56	-0.801114	0.247995	-3.23037	0.00123632	0.017719	56338	Mus musculus	thioredoxin interacting protein(Txnip)
Nupr1	728.923	-0.782137	0.133793	-5.84585	5.04e-09	6.38e-07	56312	Mus musculus	nuclear protein transcription regulator 1(Nupr1)
Stard5	685.15	-0.781705	0.132942	-5.88003	4.1e-09	5.46e-07	170460	Mus musculus	StAR related lipid transfer domain containing 5(Stard5)
Hpgds	766.028	-0.781132	0.117634	-6.64035	3.13e-11	8.27e-09	54486	Mus musculus	hematopoietic prostaglandin D synthase(Hpgds)
Hecw2	121.261	-0.780106	0.234542	-3.32608	0.000880757	0.0137976	329152	Mus musculus	HECT, C2 and WW domain containing E3 ubiquitin protein ligase 2(Hecw2)
Herpud1	6656.92	-0.774688	0.177769	-4.35783	1.31e-05	0.000551376	64209	Mus musculus	homocysteine-inducible, endoplasmic reticulum stress-inducible, ubiquitin-like domain member 1(Herpud1)
Zfp189	140.061	-0.766608	0.177432	-4.32057	1.56e-05	0.00062418	230162	Mus musculus	zinc finger protein 189(Zfp189)
C2cd4a	323.639	-0.764187	0.169685	-4.50356	6.68e-06	0.000314054	244911	Mus musculus	C2 calcium-dependent domain containing 4A(C2cd4a)
Birc3	448.495	-0.755506	0.152325	-4.95984	7.06e-07	4.91e-05	11796	Mus musculus	baculoviral IAP repeat-containing 3(Birc3)
Hspa5	46886.8	-0.754249	0.222232	-3.39398	0.000688858	0.0114221	14828	Mus musculus	heat shock protein 5(Hspa5)
Slc16a6	607.472	-0.750514	0.145438	-5.16037	2.46e-07	2.02e-05	104681	Mus musculus	solute carrier family 16 (monocarboxylic acid transporters), member 6(Slc16a6)
Tmem97	594.406	-0.750342	0.169393	-4.42959	9.44e-06	0.000422957	69071	Mus musculus	transmembrane protein 97(Tmem97)
Igf1r	21694.5	-0.747387	0.103763	-7.20283	5.9e-13	2.66e-10	16001	Mus musculus	insulin-like growth factor I receptor(Igf1r)
Igdcc4	231.431	-0.743258	0.105053	-7.0751	1.49e-12	6.18e-10	56741	Mus musculus	immunoglobulin superfamily, DCC subclass, member 4(Igdcc4)
2900060B14Rik	51.8877	-0.7401	0.184127	-4.01952	5.83e-05	0.0017282	68204	Mus musculus	RIKEN cDNA 2900060B14 gene(2900060B14Rik)
Nfil3	619.062	-0.730213	0.111504	-6.54876	5.8e-11	1.27e-08	18030	Mus musculus	nuclear factor, interleukin 3, regulated(Nfil3)
Rnu12	59.1334	-0.706656	0.223677	-3.15927	0.00158164	0.0211636	104307	Mus musculus	RNA U12, small nuclear(Rnu12)
Fmn1	770.509	-0.705562	0.165709	-4.25784	2.06e-05	0.000768496	14260	Mus musculus	formin 1(Fmn1)
Rmrp	22973.6	-0.703996	0.112218	-6.27346	3.53e-10	6.6e-08	19782	Mus musculus	RNA component of mitochondrial RNAase P(Rmrp)
Tapbpl	1196.65	-0.690275	0.111005	-6.21844	5.02e-10	8.95e-08	213233	Mus musculus	TAP binding protein-like(Tapbpl)
Cpt1a	1609.93	-0.687103	0.103086	-6.66536	2.64e-11	7.22e-09	12894	Mus musculus	carnitine palmitoyltransferase 1a, liver(Cpt1a)
Ier2	380.519	-0.686299	0.168848	-4.06459	4.81e-05	0.00148328	15936	Mus musculus	immediate early response 2(Ier2)
Dclk1	1083.14	-0.685569	0.212804	-3.2216	0.00127478	0.0180674	13175	Mus musculus	doublecortin-like kinase 1(Dclk1)
Hspb1	73.889	-0.685084	0.219541	-3.12053	0.00180524	0.0233237	15507	Mus musculus	heat shock protein 1(Hspb1)
Hspb8	329.757	-0.675073	0.186263	-3.6243	0.00028974	0.00583325	80888	Mus musculus	heat shock protein 8(Hspb8)
9630028B13Rik	31.7343	-0.671746	0.236984	-2.83456	0.00458883	0.0450099	319562	Mus musculus	RIKEN cDNA 9630028B13 gene(9630028B13Rik)
Rspo4	2070.07	-0.666653	0.100185	-6.65424	2.85e-11	7.65e-09	228770	Mus musculus	R-spondin 4(Rspo4)
Ifrd1	1002.93	-0.665478	0.12271	-5.42316	5.86e-08	5.69e-06	15982	Mus musculus	interferon-related developmental regulator 1(Ifrd1)
Prss8	135.852	-0.664783	0.150219	-4.42543	9.63e-06	0.000428681	76560	Mus musculus	serine protease 8 (prostasin)(Prss8)
Sntg2	149.994	-0.663415	0.166146	-3.99296	6.53e-05	0.00187567	268534	Mus musculus	syntrophin, gamma 2(Sntg2)
Cdkn1a	997.897	-0.661392	0.122035	-5.41969	5.97e-08	5.75e-06	12575	Mus musculus	cyclin dependent kinase inhibitor 1A(Cdkn1a)
Ifngr2	269.234	-0.659895	0.108736	-6.06881	1.29e-09	1.99e-07	15980	Mus musculus	interferon gamma receptor 2(Ifngr2)
Lratd2	1231.06	-0.653402	0.108138	-6.04227	1.52e-09	2.28e-07	399603	Mus musculus	LRAT domain containing 1(Lratd2)
Paqr5	93.6878	-0.651351	0.160951	-4.0469	5.19e-05	0.0015715	74090	Mus musculus	progestin and adipoQ receptor family member V(Paqr5)
Zfand2a	856.227	-0.650802	0.0992782	-6.55533	5.55e-11	1.25e-08	100494	Mus musculus	zinc finger, AN1-type domain 2A(Zfand2a)
Tnfrsf12a	145.036	-0.6462	0.14762	-4.37744	1.2e-05	0.000515339	27279	Mus musculus	tumor necrosis factor receptor superfamily, member 12a(Tnfrsf12a)
Aff2	2341.52	-0.642734	0.136813	-4.6979	2.63e-06	0.000151968	14266	Mus musculus	AF4/FMR2 family, member 2(Aff2)
Rassf2	269.205	-0.640676	0.150733	-4.25041	2.13e-05	0.000781181	215653	Mus musculus	Ras association (RalGDS/AF-6) domain family member 2(Rassf2)
Llph	174.793	-0.637578	0.138506	-4.60325	4.16e-06	0.000219747	66225	Mus musculus	LLP homolog, long-term synaptic facilitation (Aplysia)(Llph)
Hfe	716.869	-0.635945	0.0854683	-7.44072	1e-13	5.68e-11	15216	Mus musculus	homeostatic iron regulator(Hfe)
Sat1	660.633	-0.623764	0.15227	-4.09643	4.2e-05	0.00134761	20229	Mus musculus	spermidine/spermine N1-acetyl transferase 1(Sat1)
St8sia5	1220.27	-0.623151	0.145207	-4.29148	1.77e-05	0.000688608	225742	Mus musculus	ST8 alpha-N-acetyl-neuraminide alpha-2,8-sialyltransferase 5(St8sia5)
Krt18	1836.26	-0.621245	0.0936775	-6.63174	3.32e-11	8.47e-09	16668	Mus musculus	keratin 18(Krt18)
Klf11	1001.91	-0.618372	0.123056	-5.02513	5.03e-07	3.65e-05	194655	Mus musculus	Kruppel-like transcription factor 11(Klf11)
Mrnip	146.056	-0.613653	0.150649	-4.07338	4.63e-05	0.00144288	68067	Mus musculus	MRN complex interacting protein(Mrnip)
Dnah1	46.3734	-0.608141	0.202511	-3.003	0.00267337	0.0304979	110084	Mus musculus	dynein, axonemal, heavy chain 1(Dnah1)
Il16	90.8374	-0.606895	0.177809	-3.41319	0.000642071	0.0108101	16170	Mus musculus	interleukin 16(Il16)
Brinp2	262.127	-0.606182	0.125388	-4.83444	1.34e-06	8.35e-05	240843	Mus musculus	bone morphogenic protein/retinoic acid inducible neural-specific 2(Brinp2)
Lmo4	170.987	-0.604574	0.20334	-2.97321	0.00294699	0.032647	16911	Mus musculus	LIM domain only 4(Lmo4)
Csrnp1	365.615	-0.603138	0.15226	-3.96122	7.46e-05	0.00208855	215418	Mus musculus	cysteine-serine-rich nuclear protein 1(Csrnp1)
Tuba4a	1891.94	-0.599748	0.115758	-5.18105	2.21e-07	1.83e-05	22145	Mus musculus	tubulin, alpha 4A(Tuba4a)
Smoc1	443.066	-0.598538	0.121538	-4.9247	8.45e-07	5.61e-05	64075	Mus musculus	SPARC related modular calcium binding 1(Smoc1)
Mgam	246.206	-0.597209	0.145723	-4.09825	4.16e-05	0.00133992	232714	Mus musculus	maltase-glucoamylase(Mgam)
Cbx4	1012.18	-0.595964	0.0735002	-8.10834	5.13e-16	5.24e-13	12418	Mus musculus	chromobox 4(Cbx4)
Apcdd1	212.814	-0.592794	0.156178	-3.79562	0.000147274	0.00351229	494504	Mus musculus	adenomatosis polyposis coli down-regulated 1(Apcdd1)
Tgif1	93.3885	-0.5922	0.20664	-2.86585	0.00415888	0.0418372	21815	Mus musculus	TGFB-induced factor homeobox 1(Tgif1)
Phlda1	238.448	-0.590895	0.148602	-3.97635	7e-05	0.0019892	21664	Mus musculus	pleckstrin homology like domain, family A, member 1(Phlda1)
Plk2	693.984	-0.585983	0.134985	-4.34111	1.42e-05	0.000583867	20620	Mus musculus	polo like kinase 2(Plk2)
Elovl7	342.011	-0.585109	0.123734	-4.72878	2.26e-06	0.000132593	74559	Mus musculus	ELOVL fatty acid elongase 7(Elovl7)
A930011G23Rik	105.372	-0.58467	0.192612	-3.03548	0.00240157	0.0285007	319818	Mus musculus	RIKEN cDNA A930011G23 gene(A930011G23Rik)
Rsph4a	122.312	-0.583738	0.174055	-3.35375	0.000797231	0.0126837	212892	Mus musculus	radial spoke head 4 homolog A (Chlamydomonas)(Rsph4a)
Sesn2	2143.83	-0.583523	0.0739112	-7.89492	2.9e-15	2.23e-12	230784	Mus musculus	sestrin 2(Sesn2)
Hsd3b7	687.996	-0.579101	0.162053	-3.57354	0.00035219	0.00669468	101502	Mus musculus	hydroxy-delta-5-steroid dehydrogenase, 3 beta- and steroid delta-isomerase 7(Hsd3b7)
Rasal1	94.1771	-0.570746	0.191207	-2.98496	0.00283613	0.0318099	19415	Mus musculus	RAS protein activator like 1 (GAP1 like)(Rasal1)
Aldh9a1	1559.74	-0.570643	0.045714	-12.4829	9.26e-36	1.42e-31	56752	Mus musculus	aldehyde dehydrogenase 9, subfamily A1(Aldh9a1)
Dgkg	1975.58	-0.569906	0.133843	-4.25802	2.06e-05	0.000768496	110197	Mus musculus	diacylglycerol kinase, gamma(Dgkg)
Them4	134.022	-0.568544	0.187887	-3.02599	0.00247819	0.029074	75778	Mus musculus	thioesterase superfamily member 4(Them4)
Erlin1	763.241	-0.564452	0.127522	-4.42632	9.59e-06	0.000428152	226144	Mus musculus	ER lipid raft associated 1(Erlin1)
Mcfd2	1965.86	-0.559244	0.0962494	-5.81036	6.23e-09	7.55e-07	193813	Mus musculus	multiple coagulation factor deficiency 2(Mcfd2)
Psmg3	85.9622	-0.555166	0.157864	-3.51673	0.000436892	0.00798624	66506	Mus musculus	proteasome (prosome, macropain) assembly chaperone 3(Psmg3)
Slc3a2	5356.22	-0.554688	0.0954883	-5.80896	6.29e-09	7.55e-07	17254	Mus musculus	solute carrier family 3 (activators of dibasic and neutral amino acid transport), member 2(Slc3a2)
Ndufa5	102.478	-0.552084	0.169217	-3.26258	0.00110402	0.0162089	68202	Mus musculus	NADH:ubiquinone oxidoreductase subunit A5(Ndufa5)
Fam13c	87.4419	-0.549553	0.182832	-3.00577	0.00264905	0.0303334	71721	Mus musculus	family with sequence similarity 13, member C(Fam13c)
Lhfpl2	560.222	-0.546808	0.133371	-4.09991	4.13e-05	0.00133311	218454	Mus musculus	lipoma HMGIC fusion partner-like 2(Lhfpl2)
Eif4ebp1	729.741	-0.546072	0.10021	-5.44927	5.06e-08	4.97e-06	13685	Mus musculus	eukaryotic translation initiation factor 4E binding protein 1(Eif4ebp1)
Nfu1	449.443	-0.544477	0.125175	-4.34972	1.36e-05	0.000567499	56748	Mus musculus	NFU1 iron-sulfur cluster scaffold(Nfu1)
Kyat3	179.377	-0.539506	0.180602	-2.98726	0.00281487	0.0316409	229905	Mus musculus	kynurenine aminotransferase 3(Kyat3)
Lonp1	1645.21	-0.537096	0.0924685	-5.80842	6.31e-09	7.55e-07	74142	Mus musculus	lon peptidase 1, mitochondrial(Lonp1)
Maff	437.343	-0.536712	0.119707	-4.48353	7.34e-06	0.000340861	17133	Mus musculus	v-maf musculoaponeurotic fibrosarcoma oncogene family, protein F (avian)(Maff)
Crybg1	717.462	-0.534618	0.0990643	-5.39668	6.79e-08	6.34e-06	11630	Mus musculus	crystallin beta-gamma domain containing 1(Crybg1)
Klf10	1080.89	-0.532161	0.113326	-4.69586	2.65e-06	0.000152913	21847	Mus musculus	Kruppel-like transcription factor 10(Klf10)
Nudt22	121.249	-0.528512	0.153066	-3.45284	0.000554722	0.00958162	68323	Mus musculus	nudix hydrolase 22(Nudt22)
Eif6	746.858	-0.528174	0.0922262	-5.72694	1.02e-08	1.16e-06	16418	Mus musculus	eukaryotic translation initiation factor 6(Eif6)
Jun	1684.36	-0.527077	0.113679	-4.63654	3.54e-06	0.000192488	16476	Mus musculus	jun proto-oncogene(Jun)
Romo1	165.539	-0.526274	0.129116	-4.07599	4.58e-05	0.00143852	67067	Mus musculus	reactive oxygen species modulator 1(Romo1)
Napb	683.18	-0.524788	0.156462	-3.3541	0.000796244	0.0126811	17957	Mus musculus	N-ethylmaleimide sensitive fusion protein attachment protein beta(Napb)
Slc39a11	895.437	-0.523952	0.130759	-4.00699	6.15e-05	0.00180268	69806	Mus musculus	solute carrier family 39 (metal ion transporter), member 11(Slc39a11)
Prkar1a	24448.6	-0.520986	0.109223	-4.76991	1.84e-06	0.000111612	19084	Mus musculus	protein kinase, cAMP dependent regulatory, type I, alpha(Prkar1a)
Npas2	251.381	-0.514772	0.161293	-3.19154	0.00141516	0.0194979	18143	Mus musculus	neuronal PAS domain protein 2(Npas2)
Gnasas1	145.166	-0.513962	0.166369	-3.08929	0.00200634	0.0252331	56802	Mus musculus	GNAS antisense RNA 1(Gnasas1)
Oxtr	1818.27	-0.513485	0.105829	-4.85201	1.22e-06	7.74e-05	18430	Mus musculus	oxytocin receptor(Oxtr)
Sytl1	576.823	-0.509269	0.110807	-4.59602	4.31e-06	0.000224254	269589	Mus musculus	synaptotagmin-like 1(Sytl1)
Zfp429	87.7173	-0.509261	0.157847	-3.22631	0.00125399	0.0178886	72807	Mus musculus	zinc finger protein 429(Zfp429)
Ghitm	3436.73	-0.508823	0.113079	-4.49973	6.8e-06	0.000318793	66092	Mus musculus	growth hormone inducible transmembrane protein(Ghitm)
Slc25a20	522.694	-0.508191	0.084337	-6.02572	1.68e-09	2.45e-07	57279	Mus musculus	solute carrier family 25 (mitochondrial carnitine/acylcarnitine translocase), member 20(Slc25a20)
Acot2	145.667	-0.503058	0.144701	-3.47653	0.000507943	0.00890411	171210	Mus musculus	acyl-CoA thioesterase 2(Acot2)
Mob3b	83.3576	-0.502657	0.172947	-2.90643	0.00365584	0.0381547	214944	Mus musculus	MOB kinase activator 3B(Mob3b)
Rps29	1489.28	-0.502311	0.139249	-3.60729	0.000309417	0.00611337	20090	Mus musculus	ribosomal protein S29(Rps29)
Ube2j2	64.5729	-0.500944	0.17729	-2.82556	0.00471976	0.0457957	140499	Mus musculus	ubiquitin-conjugating enzyme E2J 2(Ube2j2)
Ciapin1	491.419	-0.500185	0.139753	-3.57905	0.000344842	0.00660416	109006	Mus musculus	cytokine induced apoptosis inhibitor 1(Ciapin1)
Lifr	5924.82	0.500739	0.0681963	7.34261	2.09e-13	1.04e-10	16880	Mus musculus	LIF receptor alpha(Lifr)
Insrr	6342.26	0.501005	0.110728	4.52466	6.05e-06	0.000292374	23920	Mus musculus	insulin receptor-related receptor(Insrr)
Loxl2	1049.71	0.501895	0.105726	4.74715	2.06e-06	0.000122512	94352	Mus musculus	lysyl oxidase-like 2(Loxl2)
Erich6	204.844	0.502436	0.142786	3.5188	0.000433505	0.00794466	545527	Mus musculus	glutamate rich 6(Erich6)
Th	524.221	0.503917	0.154923	3.25269	0.00114319	0.0166017	21823	Mus musculus	tyrosine hydroxylase(Th)
Gen1	166.762	0.504266	0.134212	3.75723	0.000171805	0.00395228	209334	Mus musculus	GEN1, Holliday junction 5' flap endonuclease(Gen1)
Inhba	585.54	0.504401	0.157791	3.19665	0.00139035	0.0192426	16323	Mus musculus	inhibin beta-A(Inhba)
Lca5l	70.3487	0.505745	0.170867	2.95987	0.00307767	0.0338256	385668	Mus musculus	Leber congenital amaurosis 5-like(Lca5l)
Lekr1	94.2173	0.506566	0.170128	2.97756	0.00290554	0.0323281	624866	Mus musculus	leucine, glutamate and lysine rich 1(Lekr1)
Hdac9	312.18	0.506576	0.177928	2.84708	0.00441226	0.0438109	79221	Mus musculus	histone deacetylase 9(Hdac9)
Galnt14	978.503	0.508813	0.111569	4.5605	5.1e-06	0.000258038	71685	Mus musculus	polypeptide N-acetylgalactosaminyltransferase 14(Galnt14)
1700042O10Rik	157.762	0.509548	0.129437	3.93666	8.26e-05	0.00227268	73321	Mus musculus	RIKEN cDNA 1700042O10 gene(1700042O10Rik)
Slc39a10	976.116	0.511539	0.0886991	5.76712	8.06e-09	9.29e-07	227059	Mus musculus	solute carrier family 39 (zinc transporter), member 10(Slc39a10)
Gm8234	115.631	0.51174	0.174181	2.93798	0.00330354	0.0356434	666680	Mus musculus	predicted gene 8234(Gm8234)
Kalrn	1374.12	0.514097	0.0775912	6.62572	3.46e-11	8.68e-09	545156	Mus musculus	kalirin, RhoGEF kinase(Kalrn)
Arhgap19	122.754	0.514964	0.137591	3.7427	0.000182051	0.00411995	71085	Mus musculus	Rho GTPase activating protein 19(Arhgap19)
Nuak2	388.442	0.5192	0.132183	3.92788	8.57e-05	0.00233209	74137	Mus musculus	NUAK family, SNF1-like kinase, 2(Nuak2)
Apob	162.682	0.525382	0.150977	3.47988	0.00050164	0.00882391	238055	Mus musculus	apolipoprotein B(Apob)
Pitpnm2os1	159.05	0.526765	0.140079	3.76048	0.000169587	0.00391301	75927	Mus musculus	phosphatidylinositol transfer protein, membrane-associated 2, opposite strand 1(Pitpnm2os1)
1700096K18Rik	127.84	0.528719	0.142231	3.71733	0.000201338	0.00440042	73571	Mus musculus	RIKEN cDNA 1700096K18 gene(1700096K18Rik)
Sh3pxd2a	6103.48	0.530064	0.0772335	6.86314	6.74e-12	2.35e-09	14218	Mus musculus	SH3 and PX domains 2A(Sh3pxd2a)
Rec8	1021.86	0.530164	0.136194	3.89271	9.91e-05	0.00258297	56739	Mus musculus	REC8 meiotic recombination protein(Rec8)
Cadm3	114.774	0.530783	0.18889	2.81	0.0049541	0.0472908	94332	Mus musculus	cell adhesion molecule 3(Cadm3)
Dnajc24	726.66	0.530854	0.0918217	5.78135	7.41e-09	8.6e-07	99349	Mus musculus	DnaJ heat shock protein family (Hsp40) member C24(Dnajc24)
Pfkfb1	93.7333	0.531398	0.154151	3.44726	0.000566301	0.00977061	18639	Mus musculus	6-phosphofructo-2-kinase/fructose-2,6-biphosphatase 1(Pfkfb1)
Gm10653	79.1695	0.531747	0.189052	2.8127	0.00491268	0.0470714	677044	Mus musculus	predicted gene 10653(Gm10653)
Pcsk4	946.837	0.532888	0.117136	4.5493	5.38e-06	0.000267976	18551	Mus musculus	proprotein convertase subtilisin/kexin type 4(Pcsk4)
Zc3h10	626.975	0.533386	0.111683	4.77591	1.79e-06	0.000108766	103284	Mus musculus	zinc finger CCCH type containing 10(Zc3h10)
Sphkap	21612.9	0.534307	0.0610871	8.74663	2.2e-18	3.26e-15	77629	Mus musculus	SPHK1 interactor, AKAP domain containing(Sphkap)
Meltf	294.974	0.534482	0.171878	3.10967	0.00187299	0.0239333	30060	Mus musculus	melanotransferrin(Meltf)
Prc1	410.017	0.534672	0.143266	3.73203	0.000189944	0.00422984	233406	Mus musculus	protein regulator of cytokinesis 1(Prc1)
Carns1	98.869	0.535417	0.143458	3.73223	0.000189793	0.00422984	107239	Mus musculus	carnosine synthase 1(Carns1)
Gm19461	800.793	0.537332	0.0814506	6.59703	4.19e-11	1.02e-08	100502933	Mus musculus	predicted gene, 19461(Gm19461)
Colgalt2	214.097	0.538544	0.119	4.52557	6.02e-06	0.000292041	269132	Mus musculus	collagen beta(1-O)galactosyltransferase 2(Colgalt2)
Shisa2	363.977	0.538646	0.1388	3.88075	0.000104136	0.00266924	219134	Mus musculus	shisa family member 2(Shisa2)
Ldlrad3	545.506	0.540717	0.0897508	6.02465	1.69e-09	2.45e-07	241576	Mus musculus	low density lipoprotein receptor class A domain containing 3(Ldlrad3)
Dio1	1820.65	0.540954	0.0967047	5.59387	2.22e-08	2.33e-06	13370	Mus musculus	deiodinase, iodothyronine, type I(Dio1)
Spsb1	471.414	0.541186	0.0787944	6.86833	6.5e-12	2.31e-09	74646	Mus musculus	splA/ryanodine receptor domain and SOCS box containing 1(Spsb1)
Kntc1	341.429	0.542191	0.175462	3.09007	0.0020011	0.0251985	208628	Mus musculus	kinetochore associated 1(Kntc1)
Pde4c	232.017	0.543963	0.151497	3.59057	0.000329951	0.00639086	110385	Mus musculus	phosphodiesterase 4C, cAMP specific(Pde4c)
Tafa1	391.992	0.544938	0.100915	5.39997	6.67e-08	6.26e-06	320265	Mus musculus	TAFA chemokine like family member 1(Tafa1)
Pde5a	3992.31	0.547467	0.0882332	6.20478	5.48e-10	9.65e-08	242202	Mus musculus	phosphodiesterase 5A, cGMP-specific(Pde5a)
Col6a6	1784.22	0.547575	0.193684	2.82716	0.00469626	0.0457124	245026	Mus musculus	collagen, type VI, alpha 6(Col6a6)
Mlph	412.004	0.548838	0.126914	4.32448	1.53e-05	0.000618062	171531	Mus musculus	melanophilin(Mlph)
Sertm1	105.803	0.555451	0.186396	2.97995	0.00288295	0.0321467	329641	Mus musculus	serine rich and transmembrane domain containing 1(Sertm1)
Fam151a	792.903	0.556631	0.133929	4.15615	3.24e-05	0.00109704	230579	Mus musculus	family with sequence simliarity 151, member A(Fam151a)
Neurog3	112.69	0.559087	0.155321	3.59955	0.000318767	0.00623133	11925	Mus musculus	neurogenin 3(Neurog3)
Glis1	103.35	0.559811	0.154571	3.62171	0.000292656	0.00588424	230587	Mus musculus	GLIS family zinc finger 1(Glis1)
Paqr8	168.883	0.562267	0.120106	4.68144	2.85e-06	0.000161646	74229	Mus musculus	progestin and adipoQ receptor family member VIII(Paqr8)
Mis18bp1	160.92	0.562399	0.201381	2.79271	0.00522692	0.0490997	217653	Mus musculus	MIS18 binding protein 1(Mis18bp1)
Gp5	71.3851	0.563399	0.183292	3.07378	0.00211362	0.0260521	14729	Mus musculus	glycoprotein 5 platelet(Gp5)
Clmp	75.8579	0.565676	0.19188	2.94808	0.00319757	0.0347693	71566	Mus musculus	CXADR-like membrane protein(Clmp)
Foxm1	249.407	0.566704	0.186058	3.04585	0.00232022	0.0279246	14235	Mus musculus	forkhead box M1(Foxm1)
Gm10845	232.506	0.567383	0.147185	3.85489	0.000115783	0.00292243	100038734	Mus musculus	predicted gene 10845(Gm10845)
Notch4	97.4683	0.567583	0.161668	3.51078	0.000446792	0.00811054	18132	Mus musculus	notch 4(Notch4)
Slc2a2	8064.03	0.569598	0.181591	3.13671	0.00170854	0.0224809	20526	Mus musculus	solute carrier family 2 (facilitated glucose transporter), member 2(Slc2a2)
Slco1a6	1482.91	0.569828	0.0936922	6.08192	1.19e-09	1.9e-07	28254	Mus musculus	solute carrier organic anion transporter family, member 1a6(Slco1a6)
Jup	2514.54	0.570576	0.080512	7.08684	1.37e-12	5.84e-10	16480	Mus musculus	junction plakoglobin(Jup)
Fkbp1b	857.982	0.574301	0.0977517	5.8751	4.23e-09	5.58e-07	14226	Mus musculus	FK506 binding protein 1b(Fkbp1b)
Cdkn2c	235.753	0.576008	0.153618	3.74962	0.000177101	0.0040248	12580	Mus musculus	cyclin dependent kinase inhibitor 2C(Cdkn2c)
Cds1	962.017	0.576507	0.0860192	6.70207	2.05e-11	6.17e-09	74596	Mus musculus	CDP-diacylglycerol synthase 1(Cds1)
Ckap2l	254.756	0.576975	0.193793	2.97727	0.00290824	0.0323346	70466	Mus musculus	cytoskeleton associated protein 2-like(Ckap2l)
Kcnn3	1973.89	0.579935	0.0916079	6.33062	2.44e-10	4.74e-08	140493	Mus musculus	potassium intermediate/small conductance calcium-activated channel, subfamily N, member 3(Kcnn3)
Trmt9b	237.242	0.580599	0.13257	4.37958	1.19e-05	0.00051174	319582	Mus musculus	tRNA methyltransferase 9B(Trmt9b)
Ky	2305.9	0.580755	0.102511	5.66531	1.47e-08	1.59e-06	16716	Mus musculus	kyphoscoliosis peptidase(Ky)
Crym	187.291	0.581818	0.131251	4.43285	9.3e-06	0.000417828	12971	Mus musculus	crystallin, mu(Crym)
Ccna2	305.025	0.582818	0.17039	3.4205	0.000625067	0.0105936	12428	Mus musculus	cyclin A2(Ccna2)
Fbxo5	83.8343	0.584857	0.186835	3.13033	0.00174608	0.0229039	67141	Mus musculus	F-box protein 5(Fbxo5)
Cdca2	197.383	0.585291	0.169139	3.46041	0.000539349	0.00937952	108912	Mus musculus	cell division cycle associated 2(Cdca2)
Lrp2bp	211.056	0.58544	0.114705	5.10388	3.33e-07	2.57e-05	67620	Mus musculus	Lrp2 binding protein(Lrp2bp)
Itga6	1892.52	0.586063	0.100119	5.85369	4.81e-09	6.24e-07	16403	Mus musculus	integrin alpha 6(Itga6)
Anln	383.819	0.589483	0.130101	4.53098	5.87e-06	0.0002883	68743	Mus musculus	anillin, actin binding protein(Anln)
Pitpnm3	2140.86	0.591579	0.103667	5.70652	1.15e-08	1.3e-06	327958	Mus musculus	PITPNM family member 3(Pitpnm3)
Fanca	141.824	0.594387	0.182582	3.25545	0.00113212	0.0165098	14087	Mus musculus	Fanconi anemia, complementation group A(Fanca)
Melk	81.1391	0.594827	0.199967	2.97463	0.00293342	0.0325438	17279	Mus musculus	maternal embryonic leucine zipper kinase(Melk)
Ube2t	54.2293	0.59491	0.20932	2.8421	0.00448175	0.0442992	67196	Mus musculus	ubiquitin-conjugating enzyme E2T(Ube2t)
Nuak1	940.986	0.595088	0.074064	8.03478	9.37e-16	8.98e-13	77976	Mus musculus	NUAK family, SNF1-like kinase, 1(Nuak1)
Rap1gap2	12315.2	0.595363	0.0585544	10.1677	2.76e-24	8.47e-21	380711	Mus musculus	RAP1 GTPase activating protein 2(Rap1gap2)
Spag5	157.417	0.596125	0.151846	3.92586	8.64e-05	0.00234571	54141	Mus musculus	sperm associated antigen 5(Spag5)
Mlxipl	5296.78	0.596435	0.0970306	6.14688	7.9e-10	1.32e-07	58805	Mus musculus	MLX interacting protein-like(Mlxipl)
Exo1	97.0261	0.601959	0.215758	2.78997	0.00527133	0.0494359	26909	Mus musculus	exonuclease 1(Exo1)
Abca4	160.926	0.619874	0.183219	3.38325	0.000716338	0.011738	11304	Mus musculus	ATP-binding cassette, sub-family A member 4(Abca4)
Nexn	350.33	0.620028	0.127407	4.86649	1.14e-06	7.25e-05	68810	Mus musculus	nexilin(Nexn)
Ap1s2	6631.64	0.620265	0.0900961	6.88448	5.8e-12	2.12e-09	108012	Mus musculus	adaptor-related protein complex 1, sigma 2 subunit(Ap1s2)
Cd44	3441.62	0.620669	0.187337	3.31311	0.000922653	0.014207	12505	Mus musculus	CD44 antigen(Cd44)
Gm32123	57.2204	0.62181	0.195392	3.18236	0.00146078	0.0200543	102634576	Mus musculus	predicted gene, 32123(Gm32123)
Map3k19	283.307	0.622236	0.173198	3.59262	0.000327366	0.00636495	22625	Mus musculus	mitogen-activated protein kinase kinase kinase 19(Map3k19)
Zfp804b	45.0574	0.622841	0.209062	2.97921	0.00288994	0.0322012	207618	Mus musculus	zinc finger protein 804B(Zfp804b)
Gm2447	61.9808	0.623062	0.193712	3.21644	0.00129792	0.0182436	329639	Mus musculus	predicted gene 2447(Gm2447)
Spon2	539.306	0.624864	0.0834103	7.49144	6.81e-14	4.35e-11	100689	Mus musculus	spondin 2, extracellular matrix protein(Spon2)
Ptprb	112.968	0.625284	0.176401	3.54467	0.000393107	0.00733593	19263	Mus musculus	protein tyrosine phosphatase receptor type B(Ptprb)
Gc	7465.94	0.631219	0.0915536	6.89453	5.4e-12	2.02e-09	14473	Mus musculus	vitamin D binding protein(Gc)
Akap6	1697.6	0.631443	0.107645	5.86595	4.47e-09	5.85e-07	238161	Mus musculus	A kinase anchor protein 6(Akap6)
Aspm	334.961	0.632098	0.156159	4.04778	5.17e-05	0.00157133	12316	Mus musculus	abnormal spindle microtubule assembly(Aspm)
Nell1os	84.3231	0.641873	0.18827	3.40932	0.000651246	0.0109046	73515	Mus musculus	NEL-like 1, opposite strand(Nell1os)
Cdk1	180.254	0.64191	0.197576	3.24893	0.00115839	0.0168065	12534	Mus musculus	cyclin dependent kinase 1(Cdk1)
Ankrd37	194.107	0.642935	0.167449	3.83959	0.000123241	0.00306521	654824	Mus musculus	ankyrin repeat domain 37(Ankrd37)
Cd93	190.965	0.644841	0.179078	3.60089	0.000317131	0.0062212	17064	Mus musculus	CD93 antigen(Cd93)
Smad6	57.8585	0.64511	0.200694	3.2144	0.00130719	0.0183401	17130	Mus musculus	SMAD family member 6(Smad6)
Tex47	52.9805	0.645477	0.228557	2.82415	0.00474068	0.0459405	70920	Mus musculus	testis expressed 47(Tex47)
Bambi-ps1	119.857	0.647268	0.171418	3.77597	0.000159389	0.00373728	81913	Mus musculus	BMP and activin membrane-bound inhibitor, pseudogene (Xenopus laevis)(Bambi-ps1)
Acvr1c	686.303	0.648576	0.0953004	6.8056	1.01e-11	3.21e-09	269275	Mus musculus	activin A receptor, type IC(Acvr1c)
C030029H02Rik	140.699	0.649558	0.159638	4.06894	4.72e-05	0.00146772	77383	Mus musculus	RIKEN cDNA C030029H02 gene(C030029H02Rik)
Svopl	74.8121	0.650019	0.214133	3.03558	0.00240074	0.0285007	320590	Mus musculus	SV2 related protein homolog (rat)-like(Svopl)
Phactr3	72.7484	0.651237	0.199878	3.25818	0.00112131	0.0163927	74189	Mus musculus	phosphatase and actin regulator 3(Phactr3)
Cdca3	133.185	0.65217	0.206284	3.16152	0.00156949	0.0210931	14793	Mus musculus	cell division cycle associated 3(Cdca3)
Flicr	42.7147	0.657183	0.233871	2.81002	0.00495376	0.0472908	78185	Mus musculus	Foxp3 regulating long intergenic noncoding RNA(Flicr)
Zwilch	105.953	0.657367	0.183857	3.57543	0.000349655	0.00666302	68014	Mus musculus	zwilch kinetochore protein(Zwilch)
Cdkn3	75.8806	0.660181	0.218474	3.02178	0.0025129	0.0293671	72391	Mus musculus	cyclin dependent kinase inhibitor 3(Cdkn3)
Ptprr	975.708	0.661106	0.107529	6.14814	7.84e-10	1.32e-07	19279	Mus musculus	protein tyrosine phosphatase receptor type R(Ptprr)
4933424L21Rik	61.8671	0.661971	0.21555	3.07108	0.00213287	0.0262472	78762	Mus musculus	RIKEN cDNA 4933424L21 gene(4933424L21Rik)
Ube2c	168.947	0.663304	0.229162	2.89448	0.00379785	0.0390778	68612	Mus musculus	ubiquitin-conjugating enzyme E2C(Ube2c)
Gm10941	83.855	0.664182	0.174993	3.79548	0.000147356	0.00351229	100169878	Mus musculus	predicted gene 10941(Gm10941)
Ddit4l	83.3033	0.672132	0.159515	4.21359	2.51e-05	0.000895526	73284	Mus musculus	DNA-damage-inducible transcript 4-like(Ddit4l)
Vrk1	1196.3	0.674448	0.0609078	11.0733	1.69e-28	6.48e-25	22367	Mus musculus	vaccinia related kinase 1(Vrk1)
Mcam	229.017	0.677046	0.221	3.06356	0.00218718	0.0266373	84004	Mus musculus	melanoma cell adhesion molecule(Mcam)
Mir670	77.5111	0.679275	0.207222	3.27801	0.00104541	0.0156566	735259	Mus musculus	microRNA 670(Mir670)
Nek2	141.134	0.681957	0.157225	4.33747	1.44e-05	0.00058888	18005	Mus musculus	NIMA (never in mitosis gene a)-related expressed kinase 2(Nek2)
Rdh16f2	36.015	0.682843	0.240277	2.8419	0.00448457	0.0442992	216454	Mus musculus	RDH16 family member 2(Rdh16f2)
Kifc1	134.491	0.683363	0.188742	3.62062	0.000293898	0.00590146	100502766	Mus musculus	kinesin family member C1(Kifc1)
Neil3	116.724	0.68428	0.234398	2.91931	0.0035081	0.0371206	234258	Mus musculus	nei like 3 (E. coli)(Neil3)
3425401B19Rik	94.866	0.68436	0.205305	3.33338	0.00085797	0.0135097	100504518	Mus musculus	RIKEN cDNA 3425401B19 gene(3425401B19Rik)
Zfp536	48.5973	0.686596	0.235563	2.9147	0.00356028	0.0374894	243937	Mus musculus	zinc finger protein 536(Zfp536)
Gas2l3	299.828	0.692306	0.177987	3.88965	0.000100391	0.0025908	237436	Mus musculus	growth arrest-specific 2 like 3(Gas2l3)
D630003M21Rik	83.9013	0.693396	0.20144	3.4422	0.000576996	0.00993276	228846	Mus musculus	RIKEN cDNA D630003M21 gene(D630003M21Rik)
Kif11	332.113	0.693445	0.125174	5.53986	3.03e-08	3.11e-06	16551	Mus musculus	kinesin family member 11(Kif11)
Trpc4	252.322	0.697237	0.108558	6.42275	1.34e-10	2.7e-08	22066	Mus musculus	transient receptor potential cation channel, subfamily C, member 4(Trpc4)
Rbm20	354.829	0.706345	0.138191	5.11136	3.2e-07	2.49e-05	73713	Mus musculus	RNA binding motif protein 20(Rbm20)
Parpbp	64.8325	0.709468	0.251467	2.82132	0.00478263	0.0461428	75317	Mus musculus	PARP1 binding protein(Parpbp)
Prr11	135.118	0.71357	0.207393	3.44066	0.000580293	0.00995596	270906	Mus musculus	proline rich 11(Prr11)
Fmo5	146.838	0.713955	0.126212	5.6568	1.54e-08	1.66e-06	14263	Mus musculus	flavin containing monooxygenase 5(Fmo5)
Slco5a1	130.881	0.71447	0.184378	3.87503	0.000106611	0.00272685	240726	Mus musculus	solute carrier organic anion transporter family, member 5A1(Slco5a1)
Nusap1	224.964	0.717831	0.184525	3.89016	0.000100179	0.0025908	108907	Mus musculus	nucleolar and spindle associated protein 1(Nusap1)
Kif18b	82.2296	0.723429	0.233489	3.09834	0.00194608	0.0246412	70218	Mus musculus	kinesin family member 18B(Kif18b)
Trim9	1432.72	0.723453	0.0974044	7.42732	1.11e-13	5.85e-11	94090	Mus musculus	tripartite motif-containing 9(Trim9)
Dkk3	40.1073	0.727069	0.254248	2.85968	0.00424063	0.0424923	50781	Mus musculus	dickkopf WNT signaling pathway inhibitor 3(Dkk3)
Kif20b	244.095	0.729163	0.172569	4.22534	2.39e-05	0.000860068	240641	Mus musculus	kinesin family member 20B(Kif20b)
Haspin	46.2912	0.730136	0.25371	2.87784	0.00400411	0.040681	14841	Mus musculus	histone H3 associated protein kinase(Haspin)
Pimreg	95.2441	0.730509	0.196682	3.71416	0.000203881	0.00443948	109212	Mus musculus	PICALM interacting mitotic regulator(Pimreg)
Cip2a	290.587	0.732909	0.125853	5.82354	5.76e-09	7.18e-07	224171	Mus musculus	cell proliferation regulating inhibitor of protein phosphatase 2A(Cip2a)
Scnn1g	202.225	0.73353	0.170529	4.3015	1.7e-05	0.0006665	20278	Mus musculus	sodium channel, nonvoltage-gated 1 gamma(Scnn1g)
Cldn2	68.3274	0.735945	0.20945	3.51371	0.000441895	0.00805026	12738	Mus musculus	claudin 2(Cldn2)
Stil	108.998	0.742879	0.163858	4.53368	5.8e-06	0.000285551	20460	Mus musculus	Scl/Tal1 interrupting locus(Stil)
R74862	132.633	0.748636	0.171203	4.3728	1.23e-05	0.00052204	97423	Mus musculus	expressed sequence R74862(R74862)
Btg3	211.95	0.74902	0.173872	4.30788	1.65e-05	0.000655228	12228	Mus musculus	BTG anti-proliferation factor 3(Btg3)
Nuf2	140.236	0.75358	0.230599	3.26792	0.00108342	0.0159893	66977	Mus musculus	NUF2, NDC80 kinetochore complex component(Nuf2)
Gli3	52.6507	0.756339	0.252753	2.99241	0.00276787	0.0313426	14634	Mus musculus	GLI-Kruppel family member GLI3(Gli3)
Nos1	153.762	0.756807	0.185255	4.08521	4.4e-05	0.00139368	18125	Mus musculus	nitric oxide synthase 1, neuronal(Nos1)
Ccnb2	147.037	0.757213	0.16109	4.70056	2.59e-06	0.000150568	12442	Mus musculus	cyclin B2(Ccnb2)
Artn	35.3922	0.758235	0.270685	2.80117	0.00509174	0.048125	11876	Mus musculus	artemin(Artn)
Abca6	75.2075	0.767894	0.242847	3.16205	0.00156661	0.0210729	76184	Mus musculus	ATP-binding cassette, sub-family A member 6(Abca6)
Knl1	367.902	0.772875	0.178098	4.3396	1.43e-05	0.000586316	76464	Mus musculus	kinetochore scaffold 1(Knl1)
Jam2	737.354	0.773483	0.156958	4.92797	8.31e-07	5.56e-05	67374	Mus musculus	junction adhesion molecule 2(Jam2)
F13a1	37.7798	0.774169	0.245039	3.15937	0.00158112	0.0211636	74145	Mus musculus	coagulation factor XIII, A1 subunit(F13a1)
Mki67	2409.92	0.774433	0.209476	3.697	0.00021816	0.00468127	17345	Mus musculus	antigen identified by monoclonal antibody Ki 67(Mki67)
H2bc12	73.0062	0.78132	0.20499	3.8115	0.000138126	0.00335378	319184	Mus musculus	H2B clustered histone 12(H2bc12)
Rasd1	718.966	0.786577	0.121811	6.45735	1.07e-10	2.21e-08	19416	Mus musculus	RAS, dexamethasone-induced 1(Rasd1)
Tmem255a	417.999	0.788794	0.169223	4.66127	3.14e-06	0.000175083	245386	Mus musculus	transmembrane protein 255A(Tmem255a)
St8sia1	845.781	0.794042	0.107831	7.36377	1.79e-13	9.13e-11	20449	Mus musculus	ST8 alpha-N-acetyl-neuraminide alpha-2,8-sialyltransferase 1(St8sia1)
Ccdc18	46.6457	0.795336	0.271305	2.93151	0.00337315	0.0360615	73254	Mus musculus	coiled-coil domain containing 18(Ccdc18)
Tpx2	340.263	0.798642	0.196565	4.06299	4.84e-05	0.0014853	72119	Mus musculus	TPX2, microtubule-associated(Tpx2)
Alpl	35.188	0.80409	0.239099	3.363	0.00077099	0.0123949	11647	Mus musculus	alkaline phosphatase, liver/bone/kidney(Alpl)
Esco2	84.3954	0.804162	0.229938	3.4973	0.000469986	0.00840548	71988	Mus musculus	establishment of sister chromatid cohesion N-acetyltransferase 2(Esco2)
Mapkapk3	163.376	0.808864	0.14187	5.70146	1.19e-08	1.33e-06	102626	Mus musculus	mitogen-activated protein kinase-activated protein kinase 3(Mapkapk3)
Slc38a8	38.3356	0.816536	0.228333	3.57608	0.000348782	0.00665465	234788	Mus musculus	solute carrier family 38, member 8(Slc38a8)
Frem2	353.503	0.817867	0.137412	5.95194	2.65e-09	3.62e-07	242022	Mus musculus	Fras1 related extracellular matrix protein 2(Frem2)
H2ac11	32.2456	0.826567	0.249724	3.30992	0.000933238	0.0143212	319167	Mus musculus	H2A clustered histone 11(H2ac11)
4930406D18Rik	30.5308	0.826676	0.283415	2.91684	0.00353594	0.0372587	73806	Mus musculus	RIKEN cDNA 4930406D18 gene(4930406D18Rik)
Cdc20	126.784	0.829858	0.198483	4.18101	2.9e-05	0.00100948	107995	Mus musculus	cell division cycle 20(Cdc20)
Ccdc162	3055.22	0.830541	0.104047	7.98235	1.44e-15	1.29e-12	75973	Mus musculus	coiled-coil domain containing 162(Ccdc162)
Sod3	169.373	0.833096	0.229295	3.63329	0.00027983	0.00571637	20657	Mus musculus	superoxide dismutase 3, extracellular(Sod3)
Plk1	128.496	0.835073	0.211159	3.95472	7.66e-05	0.00213839	18817	Mus musculus	polo like kinase 1(Plk1)
Kif14	108.003	0.836315	0.208733	4.00663	6.16e-05	0.00180268	381293	Mus musculus	kinesin family member 14(Kif14)
Dapl1	2194.11	0.838092	0.192185	4.36085	1.3e-05	0.00054682	76747	Mus musculus	death associated protein-like 1(Dapl1)
4930447N08Rik	72.7715	0.841608	0.221163	3.80537	0.000141594	0.00341633	71647	Mus musculus	RIKEN cDNA 4930447N08 gene(4930447N08Rik)
Necab2	516.804	0.842127	0.173295	4.85948	1.18e-06	7.48e-05	117148	Mus musculus	N-terminal EF-hand calcium binding protein 2(Necab2)
Ckap2	177.618	0.847357	0.195571	4.33273	1.47e-05	0.000598503	80986	Mus musculus	cytoskeleton associated protein 2(Ckap2)
Top2a	1123.96	0.855968	0.201398	4.25014	2.14e-05	0.000781181	21973	Mus musculus	topoisomerase (DNA) II alpha(Top2a)
Klhl33	345.808	0.858149	0.126212	6.79929	1.05e-11	3.29e-09	546611	Mus musculus	kelch-like 33(Klhl33)
Sgo2a	129.296	0.860349	0.192066	4.47944	7.48e-06	0.000345362	68549	Mus musculus	shugoshin 2A(Sgo2a)
Defb1	368.387	0.86934	0.120953	7.1874	6.6e-13	2.89e-10	13214	Mus musculus	defensin beta 1(Defb1)
Kif4	140.114	0.870823	0.227191	3.83299	0.000126593	0.00311823	16571	Mus musculus	kinesin family member 4(Kif4)
Cenpi	92.8204	0.872118	0.250397	3.48295	0.000495927	0.0087435	102920	Mus musculus	centromere protein I(Cenpi)
Bub1	120.813	0.873236	0.170427	5.12382	2.99e-07	2.38e-05	12235	Mus musculus	BUB1, mitotic checkpoint serine/threonine kinase(Bub1)
F730035M05Rik	32.504	0.874959	0.298746	2.92878	0.00340298	0.0363071	414124	Mus musculus	RIKEN cDNA F730035M05 gene(F730035M05Rik)
Cenpf	536.68	0.879862	0.233197	3.77304	0.00016127	0.00376076	108000	Mus musculus	centromere protein F(Cenpf)
Abca14	99.5829	0.883363	0.203029	4.35091	1.36e-05	0.000566046	67928	Mus musculus	ATP-binding cassette, sub-family A member 14(Abca14)
Gm4791	244.799	0.891709	0.119622	7.45439	9.03e-14	5.53e-11	215467	Mus musculus	predicted gene 4791(Gm4791)
Ect2	334.977	0.891862	0.165765	5.38028	7.44e-08	6.86e-06	13605	Mus musculus	ect2 oncogene(Ect2)
4921534H16Rik	84.2958	0.892254	0.234631	3.8028	0.000143069	0.00344648	66737	Mus musculus	RIKEN cDNA 4921534H16 gene(4921534H16Rik)
Ccnb1	181.747	0.895465	0.219797	4.07405	4.62e-05	0.00144167	268697	Mus musculus	cyclin B1(Ccnb1)
Itgad	155.876	0.901132	0.149979	6.00839	1.87e-09	2.63e-07	381924	Mus musculus	integrin, alpha D(Itgad)
Scn7a	83.1296	0.908567	0.28827	3.1518	0.0016227	0.0215998	20272	Mus musculus	sodium channel, voltage-gated, type VII, alpha(Scn7a)
Depdc1a	87.591	0.923412	0.217882	4.23813	2.25e-05	0.000820251	76131	Mus musculus	DEP domain containing 1a(Depdc1a)
Nr4a1	1067.96	0.923962	0.157999	5.84789	4.98e-09	6.36e-07	15370	Mus musculus	nuclear receptor subfamily 4, group A, member 1(Nr4a1)
Cyp26b1	38.559	0.929885	0.283543	3.27952	0.00103982	0.0155882	232174	Mus musculus	cytochrome P450, family 26, subfamily b, polypeptide 1(Cyp26b1)
Gm12610	56.0748	0.941895	0.216484	4.35088	1.36e-05	0.000566046	102633081	Mus musculus	predicted gene 12610(Gm12610)
Fxyd7	52.0653	0.942386	0.227092	4.14979	3.33e-05	0.00111564	57780	Mus musculus	FXYD domain-containing ion transport regulator 7(Fxyd7)
Sapcd2	59.4636	0.949844	0.272487	3.48583	0.000490612	0.00868979	72080	Mus musculus	suppressor APC domain containing 2(Sapcd2)
9630001P10Rik	22.1654	0.952094	0.289535	3.28836	0.00100773	0.0152176	319251	Mus musculus	RIKEN cDNA 9630001P10 gene(9630001P10Rik)
Synpo2	132.019	0.952902	0.127983	7.44554	9.65e-14	5.68e-11	118449	Mus musculus	synaptopodin 2(Synpo2)
Clstn2	475.937	0.957859	0.145666	6.57574	4.84e-11	1.12e-08	64085	Mus musculus	calsyntenin 2(Clstn2)
Slc28a2b	43.3353	0.957982	0.314648	3.04461	0.00232979	0.0279836	381417	Mus musculus	solute carrier family 28 member 2b(Slc28a2b)
Hmmr	262.383	0.965493	0.206541	4.67459	2.95e-06	0.000165907	15366	Mus musculus	hyaluronan mediated motility receptor (RHAMM)(Hmmr)
Cyp4f18	19.9392	0.968743	0.33955	2.85302	0.00433063	0.0431402	72054	Mus musculus	cytochrome P450, family 4, subfamily f, polypeptide 18(Cyp4f18)
Cenpe	336.057	0.978939	0.271417	3.60677	0.000310038	0.00611337	229841	Mus musculus	centromere protein E(Cenpe)
Rflna	531.762	0.989852	0.109273	9.05855	1.32e-19	2.89e-16	73121	Mus musculus	refilin A(Rflna)
Cib3	38.6573	0.998395	0.310064	3.21996	0.00128207	0.0181366	234421	Mus musculus	calcium and integrin binding family member 3(Cib3)
D030025P21Rik	16.7762	1.00646	0.343874	2.92682	0.00342444	0.0364599	100303738	Mus musculus	RIKEN cDNA D030025P21 gene(D030025P21Rik)
Gm9949	17.9517	1.01535	0.353474	2.8725	0.00407238	0.0411291	225609	Mus musculus	predicted gene 9949(Gm9949)
Gm8439	35.5426	1.01821	0.249914	4.07424	4.62e-05	0.00144167	667063	Mus musculus	predicted gene 8439(Gm8439)
Zp2	48.2568	1.01957	0.272912	3.7359	0.000187043	0.00421131	22787	Mus musculus	zona pellucida glycoprotein 2(Zp2)
Lgi2	757.518	1.02154	0.283678	3.60106	0.000316919	0.0062212	246316	Mus musculus	leucine-rich repeat LGI family, member 2(Lgi2)
Gfra2	23.5349	1.02173	0.364229	2.80519	0.00502871	0.047765	14586	Mus musculus	glial cell line derived neurotrophic factor family receptor alpha 2(Gfra2)
Zmynd10	34.9373	1.02919	0.245054	4.19984	2.67e-05	0.000940737	114602	Mus musculus	zinc finger, MYND domain containing 10(Zmynd10)
Abca9	40.9524	1.02956	0.232793	4.42266	9.75e-06	0.000432963	217262	Mus musculus	ATP-binding cassette, sub-family A member 9(Abca9)
Trpm5	1597.6	1.03336	0.190944	5.41182	6.24e-08	5.9e-06	56843	Mus musculus	transient receptor potential cation channel, subfamily M, member 5(Trpm5)
Pbk	210.061	1.05126	0.189915	5.53542	3.1e-08	3.17e-06	52033	Mus musculus	PDZ binding kinase(Pbk)
Arhgef37	246.838	1.05399	0.15782	6.67846	2.41e-11	6.74e-09	328967	Mus musculus	Rho guanine nucleotide exchange factor 37(Arhgef37)
Stmn2	60.1234	1.05549	0.349659	3.01864	0.00253915	0.0295552	20257	Mus musculus	stathmin-like 2(Stmn2)
5830444B04Rik	96.7077	1.07205	0.305229	3.51228	0.000444273	0.00808398	641454	Mus musculus	RIKEN cDNA 5830444B04 gene(5830444B04Rik)
Apof	74.2682	1.08545	0.218102	4.97681	6.46e-07	4.59e-05	103161	Mus musculus	apolipoprotein F(Apof)
Casp12	21.8423	1.0925	0.392171	2.78576	0.0053402	0.0498366	12364	Mus musculus	caspase 12(Casp12)
Gm36582	19.62	1.1	0.325189	3.38265	0.000717892	0.0117509	102640545	Mus musculus	predicted gene, 36582(Gm36582)
Serpina3c	26.2409	1.11019	0.334472	3.31925	0.000902601	0.0140076	16625	Mus musculus	serine (or cysteine) peptidase inhibitor, clade A, member 3C(Serpina3c)
Chrna3	18.13	1.11102	0.393382	2.82428	0.00473874	0.0459405	110834	Mus musculus	cholinergic receptor, nicotinic, alpha polypeptide 3(Chrna3)
Csmd2os	33.3376	1.12071	0.291855	3.83996	0.000123056	0.00306521	74989	Mus musculus	CUB and Sushi multiple domains 2, opposite strand(Csmd2os)
Taf7l2	82.6886	1.12286	0.212306	5.28886	1.23e-07	1.08e-05	619332	Mus musculus	Taf7l2(Taf7l2)
1700025C18Rik	28.0426	1.12316	0.287178	3.91102	9.19e-05	0.00244886	72211	Mus musculus	RIKEN cDNA 1700025C18 gene(1700025C18Rik)
Upk3a	125.178	1.12503	0.233028	4.82789	1.38e-06	8.56e-05	22270	Mus musculus	uroplakin 3A(Upk3a)
Stab2	307.413	1.16236	0.173925	6.68308	2.34e-11	6.74e-09	192188	Mus musculus	stabilin 2(Stab2)
Tnn	47.3968	1.17288	0.305682	3.83694	0.000124575	0.00307404	329278	Mus musculus	tenascin N(Tnn)
Npas4	118.341	1.17769	0.172878	6.81229	9.61e-12	3.2e-09	225872	Mus musculus	neuronal PAS domain protein 4(Npas4)
Aass	248.523	1.19243	0.18781	6.3491	2.17e-10	4.25e-08	30956	Mus musculus	aminoadipate-semialdehyde synthase(Aass)
Otoa	156.759	1.21805	0.214436	5.68025	1.34e-08	1.48e-06	246190	Mus musculus	otoancorin(Otoa)
Slc6a19os	149.534	1.27138	0.171016	7.43429	1.05e-13	5.75e-11	71390	Mus musculus	solute carrier family 6 (neurotransmitter transporter), member 19, opposite strand(Slc6a19os)
Prph	48.3786	1.34899	0.399742	3.37465	0.000739086	0.0119826	19132	Mus musculus	peripherin(Prph)
4930542M03Rik	14.3625	1.50858	0.403647	3.73737	0.000185957	0.00419595	75154	Mus musculus	RIKEN cDNA 4930542M03 gene(4930542M03Rik)
Tbx20	14.6424	1.8514	0.655061	2.8263	0.00470895	0.0457778	57246	Mus musculus	T-box 20(Tbx20)
Gm2176	22.6454	1.88609	0.36272	5.19986	1.99e-07	1.68e-05	100039348	Mus musculus	predicted gene 2176(Gm2176)
Rab39	282.577	2.04557	0.201782	10.1375	3.77e-24	9.61e-21	270160	Mus musculus	RAB39, member RAS oncogene family(Rab39)
Mc5r	145.911	2.30616	0.444654	5.18641	2.14e-07	1.79e-05	17203	Mus musculus	melanocortin 5 receptor(Mc5r)
Slc35f2	28.9302	3.18115	0.476349	6.67819	2.42e-11	6.74e-09	72022	Mus musculus	solute carrier family 35, member F2(Slc35f2)

## Sheet: Supplementary Table 3
				Details about Antibodies used in western blot (WB) and immunofluorescence (IF)
Antigem	Source	Species	Clonality	Application	Concentration
GFP	Abcam (ab6673)	Goat	Polyclonal	Immunoflurescence	1:200
RAN	Proteintech (10469-1-AP)	Rabbit	Polyclonal	Western blot	1:5000
Glucagon	Millipore Sigma (MABN238)	Mouse	Monoclonal	Immunoflurescence	1:10000
GPT2	Santa Cruz (sc398383)	Mouse	Monoclonal	Western blot	1:5000
Insulin	Dako (A0564)	Guinea pig	Polyclonal	Immunoflurescence	1:300
All secondary antibodies were procured from Jackson Immunoresearch
Target species	Code	Host species	Application	Concentration
Rabbit	711-035-152	Donkey	WB	1:10000
Mouse	715-035-150	Donkey	WB	1::10000
Guinea pig	706-225-148	Donkey	IF (Cy2)	1:500
Guinea pig	706-175-148	Donkey	IF (Cy5)	1:500
Mouse	715-225-140	Donkey	IF (Cy2)	1:500
Goat	705-225-147	Donkey	IF (Cy2)	1:500
Goat	705-175-147	Donkey	IF (Cy5)	1:500

## Sheet: Supplementary Table 4
				Details of human islet donors and donor islet characteristics
Islet preparation	IIDP Donor 1	IIDP Donor 2	IIDP Donor 3	IIDP Donor 4	HPAP-099	HPAP-147	HPAP-153	HPAP-177	HPAP-150
Unique identifier	RRID:SAMN38428316	RRID:SAMN38050797	RRID:SAMN37735327	RRID:SAMN38750927	HPAP-099	HPAP-147	HPAP-153	HPAP-177	HPAP-150
Donor age (years)	51	64	54	34	28	56	54	51	61
Donor sex (M/F)	M	M	F	M	F	F	M	F	F
Donor race	Caucasian	Caucasian	Caucasian	Caucasian	Hispanic	Caucasian	Hispanic	African-American	Caucasian
Donor BMI (kg/m2)	25.6	25.3	23.6	24.5	24.7	39.46	38.58	39.14	36.13
Donor HbA1c or other measure of blood glucose control	5.9	5.2	5.6	5.4	5	6.8	6.3	7	8.1
Origin/source of islets	University of Wisconsin	Prodo Laboratories	Prodo Laboratories	Prodo Laboratories	PADV-Gift of Life Donor Program	VATB - LifeNet Health	TXSA - Texas Organ Sharing Alliance	PADV-Gift of Life Donor Program	PATF - Center for Organ Recovery and Educ.
Islet isolation centre	University of Wisconsin	Prodo Laboratories	Prodo Laboratories	Prodo Laboratories	PADV-Gift of Life Donor Program	VATB - LifeNet Health	TXSA - Texas Organ Sharing Alliance	PADV-Gift of Life Donor Program	PATF - Center for Organ Recovery and Educ.
Donor history of diabetes? Please select yes/no from drop down list	No	No	No	No	No	Yes	Yes	Yes	Yes
Donor cause of death	Anoxia	Cerebrovascular/Stroke	Anoxia	Anoxia	CVA/Stroke	Anoxia	Cerebrovascular/Stroke	Cerebrovascular/Stroke	Cerebrovascular/Stroke
Cold ischaemia time (h)	04:45:00	10:15:00	07:05:00	07:40:00	06:09:00	1 day, 1:09:00	20:04:00	07:26:00	18:13:00
Estimated purity (%)	95	90	85	95	85	70	85	90	85
Estimated viability (%)	98	95	95	95	95	92	93	94	97
GSIR	1.2	4.9	5.7	2.7	1.25	6.31	1.59	1.33	1
Biospecimen Type	Islet	Islet	Islet	Islet	Islet	Islet	Islet	Islet	Islet
Anatomical site	Pancreas	Pancreas	Pancreas	Pancreas	Pancreas	Pancreas	Pancreas	Pancreas	Pancreas
Vital state of patient	Postmortem	Postmortem	Postmortem	Postmortem	Postmortem	Postmortem	Postmortem	Postmortem	Postmortem
